# Supplementary material for: Influence of Group 15 elements on the [3 + 2] cycloaddition reactivity of G15 = G15–G15-based 1,3-dipoles with cyclooctyne
Source: Royal Society of Chemistry journal article supplement (doi:10.1039/d3dt00313b), 2023-01-01
Supplement: d3dt00313b1.pdf [file d3dt00313b1.pdf]

# Supporting Information

## **Influence of the Effect of Group 15 Element on the Reactivity of [3 + 2] Cycloaddition Reactions of G15=G15– G15-based 1,3-Dipoles with Clclocyene**

Zheng-Feng Zhang<sup>1</sup> and Ming-Der Su<sup>1,2\*</sup>

<sup>1</sup>Department of Applied Chemistry, National Chiayi University,  
Chiayi 60004, Taiwan

<sup>2</sup>Department of Medicinal and Applied Chemistry, Kaohsiung Medical  
University, Kaohsiung 80708, Taiwan

\*E-mail: [midesu@mail.ncyu.edu.tw](mailto:midesu@mail.ncyu.edu.tw)

(All were calculated at the M06-2X-D3/Def2-TZVP level of theory.)

NNP-Rea

G = -1183.715135 Hartree

---

|   |             |             |            |
|---|-------------|-------------|------------|
| P | 3.72146000  | 8.97549200  | 6.38099100 |
| N | 2.57980600  | 8.52871600  | 5.10128200 |
| N | 2.44127600  | 7.32444300  | 4.87326500 |
| C | 1.45208600  | 6.99417200  | 3.89996800 |
| C | 0.57015700  | 7.92582500  | 3.33584200 |
| H | 0.63051200  | 8.96663900  | 3.65452000 |
| C | -0.35771600 | 7.50243400  | 2.39629000 |
| H | -1.04992600 | 8.22562300  | 1.95811100 |
| C | -0.43000100 | 6.15713700  | 1.99509600 |
| C | -1.44739300 | 5.72602000  | 0.97272200 |
| H | -1.30945500 | 6.27183700  | 0.02767700 |
| H | -2.46878900 | 5.93458000  | 1.32404900 |
| H | -1.37186000 | 4.65188000  | 0.76114200 |
| C | 0.45659000  | 5.24286900  | 2.57021000 |
| H | 0.41421300  | 4.19336300  | 2.27194200 |
| C | 1.38954400  | 5.65494500  | 3.52005900 |
| H | 2.08827200  | 4.95525200  | 3.98066600 |
| C | 4.31410000  | 10.54493600 | 5.64733600 |
| C | 4.17872500  | 10.85697100 | 4.28846700 |
| H | 3.67475400  | 10.15519200 | 3.62204800 |
| C | 4.68266200  | 12.05796000 | 3.79209700 |
| H | 4.57234000  | 12.29394900 | 2.73241100 |
| C | 5.33020100  | 12.95426000 | 4.64324600 |
| H | 5.72592600  | 13.89219100 | 4.25046300 |
| C | 5.46565200  | 12.65173500 | 5.99746200 |
| H | 5.96484000  | 13.35201900 | 6.66888000 |
| C | 4.95046300  | 11.45669900 | 6.49803600 |
| H | 5.04401900  | 11.22810600 | 7.56287800 |
| C | 5.13529300  | 7.84353600  | 6.05976700 |
| C | 5.00426700  | 6.52023900  | 6.50493800 |
| H | 4.09360700  | 6.21202200  | 7.02228600 |
| C | 6.02474800  | 5.59746200  | 6.28646000 |
| H | 5.90872800  | 4.56884700  | 6.63154200 |
| C | 7.19542400  | 5.99138500  | 5.63850900 |

|   |            |            |            |
|---|------------|------------|------------|
| H | 7.99909200 | 5.27155400 | 5.47524500 |
| C | 7.33861700 | 7.30858900 | 5.20525500 |
| H | 8.25383300 | 7.62218600 | 4.70054400 |
| C | 6.31285900 | 8.23128000 | 5.40947700 |
| H | 6.43306600 | 9.25821200 | 5.05933200 |

-----

**PPP-Rea**

G = -1756.854938 Hartree

-----

|   |             |             |             |
|---|-------------|-------------|-------------|
| P | 4.13669500  | 8.62224100  | 6.33278900  |
| P | 3.30571400  | 7.93988900  | 4.36374700  |
| P | 1.46294300  | 7.46940000  | 5.07453800  |
| C | 0.55438200  | 6.93184400  | 3.57753200  |
| C | 0.89616600  | 7.23828900  | 2.24873100  |
| H | 1.77586300  | 7.85170000  | 2.04035200  |
| C | 0.12182700  | 6.77462500  | 1.19455100  |
| H | 0.40367200  | 7.02600100  | 0.16912900  |
| C | -1.02258000 | 5.99306200  | 1.41983200  |
| C | -1.84818900 | 5.50247700  | 0.26124400  |
| H | -2.23116200 | 6.34603300  | -0.33184900 |
| H | -2.70475000 | 4.90794600  | 0.60329100  |
| H | -1.24369500 | 4.87739900  | -0.41245900 |
| C | -1.36877600 | 5.69775300  | 2.74015500  |
| H | -2.25765100 | 5.09607000  | 2.94162600  |
| C | -0.59767800 | 6.16560100  | 3.80345200  |
| H | -0.89350800 | 5.92730100  | 4.82844900  |
| C | 4.53787200  | 10.35989600 | 5.83917900  |
| C | 3.52393200  | 11.17138200 | 5.31008200  |
| H | 2.53689300  | 10.74621200 | 5.11140900  |
| C | 3.76228800  | 12.51465100 | 5.02788200  |
| H | 2.96279500  | 13.12819700 | 4.60941600  |
| C | 5.01562600  | 13.07226600 | 5.27898600  |
| H | 5.20369100  | 14.12370300 | 5.05702400  |
| C | 6.02592700  | 12.27713700 | 5.81764100  |
| H | 7.00882800  | 12.70513300 | 6.02188000  |
| C | 5.79106400  | 10.93122000 | 6.09733800  |
| H | 6.59328100  | 10.32155400 | 6.51775300  |

|   |            |            |            |
|---|------------|------------|------------|
| C | 5.78757800 | 7.80760800 | 6.17925900 |
| C | 6.20928400 | 6.99423600 | 7.23613900 |
| H | 5.56873200 | 6.87953500 | 8.11357900 |
| C | 7.43794200 | 6.33279100 | 7.17708100 |
| H | 7.75584200 | 5.70231900 | 8.00888700 |
| C | 8.25384200 | 6.48005400 | 6.05858200 |
| H | 9.21411800 | 5.96412500 | 6.01025400 |
| C | 7.84117500 | 7.28899300 | 4.99664800 |
| H | 8.47746900 | 7.40459200 | 4.11778800 |
| C | 6.61636000 | 7.94670300 | 5.05530800 |
| H | 6.29818600 | 8.58062200 | 4.22329400 |

-----

**AsAsP-Rea**

G = -5545.645377 Hartree

-----

|    |             |             |             |
|----|-------------|-------------|-------------|
| P  | 4.20832500  | 8.71015200  | 6.32411200  |
| As | 3.33921400  | 8.04288100  | 4.23667300  |
| As | 1.37838800  | 7.40337500  | 5.11284300  |
| C  | 0.40573000  | 6.82142300  | 3.52694600  |
| C  | 0.68263900  | 7.22529200  | 2.21083600  |
| H  | 1.49805700  | 7.92522800  | 2.01267700  |
| C  | -0.07788800 | 6.75029100  | 1.15019200  |
| H  | 0.15262100  | 7.07881400  | 0.13375800  |
| C  | -1.14226700 | 5.85989100  | 1.35930300  |
| C  | -1.95156800 | 5.35429900  | 0.19535900  |
| H  | -1.32049800 | 4.77970400  | -0.49890900 |
| H  | -2.38607900 | 6.18949300  | -0.37321200 |
| H  | -2.77027600 | 4.70437800  | 0.52945700  |
| C  | -1.42373100 | 5.46724700  | 2.66976700  |
| H  | -2.25097700 | 4.77969700  | 2.85921100  |
| C  | -0.66647000 | 5.94519600  | 3.73918100  |
| H  | -0.91489800 | 5.62488000  | 4.75451900  |
| C  | 4.62868600  | 10.45755300 | 5.89039400  |
| C  | 3.63359700  | 11.29287800 | 5.36172200  |
| H  | 2.64897400  | 10.88134100 | 5.12466900  |
| C  | 3.88582300  | 12.64322900 | 5.12993800  |
| H  | 3.10065400  | 13.27448200 | 4.71069800  |

|   |            |             |            |
|---|------------|-------------|------------|
| C | 5.13473300 | 13.18533400 | 5.43177900 |
| H | 5.33394400 | 14.24217000 | 5.24868300 |
| C | 6.12596000 | 12.36721200 | 5.97147800 |
| H | 7.10502600 | 12.78260300 | 6.21616300 |
| C | 5.87681700 | 11.01452700 | 6.20138000 |
| H | 6.66421800 | 10.38793300 | 6.62489500 |
| C | 5.85128000 | 7.88062600  | 6.16286100 |
| C | 6.22114200 | 6.98070500  | 7.16809900 |
| H | 5.54966400 | 6.81560100  | 8.01382400 |
| C | 7.43698600 | 6.29720400  | 7.09831300 |
| H | 7.71324100 | 5.59884600  | 7.88980500 |
| C | 8.29385700 | 6.50962300  | 6.02162800 |
| H | 9.24453100 | 5.97703200  | 5.96544900 |
| C | 7.93405200 | 7.40579800  | 5.01180500 |
| H | 8.60197800 | 7.57296900  | 4.16529600 |
| C | 6.72121500 | 8.08428900  | 5.08023600 |
| H | 6.44529800 | 8.78636300  | 4.28868200 |

-----

### SbSbP-Rea

G = -1554.750739 Hartree

-----

|    |             |            |             |
|----|-------------|------------|-------------|
| P  | 4.57689400  | 8.63309800 | 6.25335200  |
| Sb | 3.47565300  | 7.94394000 | 4.03796100  |
| Sb | 1.30539300  | 7.29120400 | 5.35435000  |
| C  | 0.04109300  | 6.76580800 | 3.68197900  |
| C  | 0.15441400  | 7.32265700 | 2.39840500  |
| H  | 0.91051000  | 8.08541100 | 2.19370500  |
| C  | -0.69524700 | 6.92560000 | 1.37143400  |
| H  | -0.58806900 | 7.37458300 | 0.38071200  |
| C  | -1.69141800 | 5.96248100 | 1.58476000  |
| C  | -2.60275300 | 5.54506500 | 0.46137200  |
| H  | -2.02619700 | 5.12410100 | -0.37555900 |
| H  | -3.16471700 | 6.40622200 | 0.07071300  |
| H  | -3.32511800 | 4.78823400 | 0.79294000  |
| C  | -1.81108200 | 5.41494700 | 2.86424500  |
| H  | -2.58248200 | 4.66597400 | 3.05789100  |
| C  | -0.96290200 | 5.81327300 | 3.89830800  |

|   |             |             |            |
|---|-------------|-------------|------------|
| H | -1.09311500 | 5.36307500  | 4.88654600 |
| C | 4.91870000  | 10.39435200 | 5.80879900 |
| C | 5.71768800  | 10.78855100 | 4.72365200 |
| H | 6.20428400  | 10.02892300 | 4.10553400 |
| C | 5.90215700  | 12.13695600 | 4.43363400 |
| H | 6.52676900  | 12.42855000 | 3.58770800 |
| C | 5.28448300  | 13.11435700 | 5.21802000 |
| H | 5.42754900  | 14.17111700 | 4.98724200 |
| C | 4.48626200  | 12.73540300 | 6.29414200 |
| H | 4.00245000  | 13.49357300 | 6.91193300 |
| C | 4.30720600  | 11.38243900 | 6.58888900 |
| H | 3.68556100  | 11.08654400 | 7.43713800 |
| C | 6.23345900  | 7.84730400  | 6.03035400 |
| C | 6.31686900  | 6.48304500  | 5.71396700 |
| H | 5.40478700  | 5.91478200  | 5.50941600 |
| C | 7.54927600  | 5.83606300  | 5.65575000 |
| H | 7.59044300  | 4.77603200  | 5.40004900 |
| C | 8.72369400  | 6.53939300  | 5.92145000 |
| H | 9.68972300  | 6.03495700  | 5.87307700 |
| C | 8.65254100  | 7.89165100  | 6.25249600 |
| H | 9.56455700  | 8.45062100  | 6.46887200 |
| C | 7.41982500  | 8.54080100  | 6.31040900 |
| H | 7.38285400  | 9.59947500  | 6.57487000 |

-----

**BiBiP-Rea**

G = -1503.409914 Hartree

-----

|    |             |            |            |
|----|-------------|------------|------------|
| P  | 4.37611200  | 8.94753100 | 6.29648000 |
| Bi | 3.43966000  | 8.21805900 | 3.92454400 |
| Bi | 1.13902900  | 7.44480000 | 5.22661000 |
| C  | 0.00352900  | 6.70305400 | 3.41744300 |
| C  | 0.14117000  | 7.24880400 | 2.13332500 |
| H  | 0.82022600  | 8.08884500 | 1.96062400 |
| C  | -0.58611200 | 6.74263600 | 1.05946100 |
| H  | -0.46011200 | 7.18433200 | 0.06746700 |
| C  | -1.48081300 | 5.67746600 | 1.22784000 |
| C  | -2.27575400 | 5.15285100 | 0.06120900 |

|   |             |             |             |
|---|-------------|-------------|-------------|
| H | -1.62692400 | 4.97116400  | -0.81009700 |
| H | -3.04507400 | 5.88032000  | -0.24752500 |
| H | -2.78379700 | 4.21151500  | 0.31583500  |
| C | -1.62233500 | 5.13733300  | 2.50849900  |
| H | -2.31315600 | 4.30555600  | 2.66665900  |
| C | -0.89552500 | 5.64414200  | 3.58748100  |
| H | -1.03929600 | 5.19045100  | 4.57257500  |
| C | 4.93405000  | 10.66636300 | 5.91755900  |
| C | 4.03617200  | 11.57553700 | 5.33691400  |
| H | 3.04483900  | 11.23476600 | 5.02451100  |
| C | 4.38740300  | 12.91071700 | 5.15095400  |
| H | 3.67413400  | 13.59708100 | 4.69150200  |
| C | 5.64383100  | 13.36762600 | 5.54765300  |
| H | 5.92191800  | 14.41196100 | 5.39916100  |
| C | 6.53956700  | 12.47840800 | 6.13962900  |
| H | 7.52284300  | 12.82577000 | 6.46161800  |
| C | 6.18869800  | 11.14214500 | 6.32768100  |
| H | 6.90095600  | 10.46249700 | 6.79974000  |
| C | 5.95661600  | 7.99362700  | 6.21011800  |
| C | 6.13864800  | 6.96893100  | 7.14676800  |
| H | 5.37321900  | 6.79811700  | 7.90736100  |
| C | 7.28319800  | 6.17017900  | 7.11891100  |
| H | 7.40799600  | 5.37571900  | 7.85644900  |
| C | 8.26486500  | 6.39176500  | 6.15647900  |
| H | 9.16173300  | 5.77081100  | 6.13453500  |
| C | 8.09723200  | 7.41332100  | 5.21824600  |
| H | 8.86220300  | 7.59071200  | 4.46043100  |
| C | 6.95201600  | 8.20382900  | 5.24175500  |
| H | 6.82902800  | 9.00182100  | 4.50410500  |

-----

**NNN-Rea**

G = -897.158177 Hartree

-----

|   |            |            |            |
|---|------------|------------|------------|
| N | 4.27155200 | 8.91842700 | 4.91192900 |
| N | 3.16079600 | 8.55658300 | 4.26090300 |
| N | 3.01431000 | 7.33829200 | 4.08074900 |
| C | 1.81627300 | 6.98516600 | 3.41603700 |

|   |             |             |            |
|---|-------------|-------------|------------|
| C | 0.74792600  | 7.86446900  | 3.18026400 |
| H | 0.81884600  | 8.89497900  | 3.52744300 |
| C | -0.38485900 | 7.41029000  | 2.51948300 |
| H | -1.21373700 | 8.10022300  | 2.34213900 |
| C | -0.49471500 | 6.08201600  | 2.07844900 |
| C | -1.73690100 | 5.61564900  | 1.36626700 |
| H | -1.91458700 | 6.20631800  | 0.45531000 |
| H | -2.62458100 | 5.72804000  | 2.00654000 |
| H | -1.65824300 | 4.55968900  | 1.07717400 |
| C | 0.57336200  | 5.21655400  | 2.32808900 |
| H | 0.51037600  | 4.17728800  | 1.99830000 |
| C | 1.71490700  | 5.65871900  | 2.99322700 |
| H | 2.55242300  | 4.98982600  | 3.19476500 |
| C | 4.50582200  | 10.30578100 | 5.04753200 |
| C | 3.85206100  | 11.22542700 | 4.21495900 |
| H | 3.16839600  | 10.86047600 | 3.45131600 |
| C | 4.08544200  | 12.58795600 | 4.37275400 |
| H | 3.57082300  | 13.29303000 | 3.71794100 |
| C | 4.97316400  | 13.05560900 | 5.34168300 |
| H | 5.15594300  | 14.12461000 | 5.45404800 |
| C | 5.62542500  | 12.13744400 | 6.16218800 |
| H | 6.32013700  | 12.48434400 | 6.92868600 |
| C | 5.39531400  | 10.77085800 | 6.02548900 |
| H | 5.90105600  | 10.06215000 | 6.68105800 |
| C | 5.21300400  | 7.95796600  | 5.40144100 |
| C | 4.85521100  | 7.08386700  | 6.42889800 |
| H | 3.84497200  | 7.12377400  | 6.83676200 |
| C | 5.78872000  | 6.16960000  | 6.90892600 |
| H | 5.51024200  | 5.48382000  | 7.71014300 |
| C | 7.07647800  | 6.13252600  | 6.37173300 |
| H | 7.80651300  | 5.41771000  | 6.75386900 |
| C | 7.42882900  | 7.00897700  | 5.34646300 |
| H | 8.43341000  | 6.98178700  | 4.92231300 |
| C | 6.49505100  | 7.91895200  | 4.85418100 |
| H | 6.75283400  | 8.61137000  | 4.05106200 |

-----

**NNAs-Rea**



G = -3078.094396 Hartree

---

|    |             |             |             |
|----|-------------|-------------|-------------|
| As | 3.68533400  | 9.00625400  | 6.55960700  |
| N  | 2.49938600  | 8.56863500  | 5.10900500  |
| N  | 2.24336600  | 7.36855200  | 5.02767400  |
| C  | 1.33126800  | 6.99726000  | 3.98958900  |
| C  | 0.61843500  | 7.92073000  | 3.21435800  |
| H  | 0.75710700  | 8.98511200  | 3.40522200  |
| C  | -0.24675300 | 7.46063500  | 2.23303200  |
| H  | -0.80866500 | 8.17797400  | 1.62987400  |
| C  | -0.41942500 | 6.08563000  | 1.99762100  |
| C  | -1.36367200 | 5.61464500  | 0.92395200  |
| H  | -1.06115900 | 6.00054700  | -0.06077200 |
| H  | -2.38562200 | 5.97373200  | 1.11548600  |
| H  | -1.39137500 | 4.51906900  | 0.86764600  |
| C  | 0.29970300  | 5.18055600  | 2.78259000  |
| H  | 0.17715600  | 4.10860000  | 2.61498700  |
| C  | 1.16657000  | 5.63078800  | 3.77688400  |
| H  | 1.73370500  | 4.93831300  | 4.40043100  |
| C  | 4.34877800  | 10.65296400 | 5.76054900  |
| C  | 4.24915800  | 10.91586300 | 4.38868700  |
| H  | 3.75945000  | 10.19278500 | 3.73411700  |
| C  | 4.77000100  | 12.09749800 | 3.86352400  |
| H  | 4.68898200  | 12.29613500 | 2.79349500  |
| C  | 5.39663200  | 13.02279200 | 4.69964600  |
| H  | 5.80542700  | 13.94537000 | 4.28441300  |
| C  | 5.49562300  | 12.76858300 | 6.06652400  |
| H  | 5.97969700  | 13.49112900 | 6.72545900  |
| C  | 4.96612100  | 11.59071500 | 6.59505700  |
| H  | 5.03634400  | 11.40253800 | 7.66981100  |
| C  | 5.14896600  | 7.80794300  | 6.06335000  |
| C  | 4.98000200  | 6.44178900  | 6.32589700  |
| H  | 4.05531800  | 6.08612700  | 6.78443100  |
| C  | 5.98246600  | 5.53211400  | 5.99309700  |
| H  | 5.83905900  | 4.46942400  | 6.19552400  |
| C  | 7.16851400  | 5.98026000  | 5.41212600  |
| H  | 7.95610300  | 5.26903600  | 5.15807400  |
| C  | 7.34698100  | 7.33981300  | 5.16084100  |

|   |            |            |            |
|---|------------|------------|------------|
| H | 8.27380400 | 7.69563200 | 4.70781000 |
| C | 6.34085800 | 8.25190800 | 5.48086600 |
| H | 6.48835100 | 9.31311000 | 5.27002600 |

-----

**NNSb-Rea**

G = -1082.636147 Hartree

-----

|    |             |             |             |
|----|-------------|-------------|-------------|
| Sb | 3.62194000  | 8.98227000  | 6.80811900  |
| N  | 2.38756100  | 8.53070800  | 5.11782500  |
| N  | 1.98079800  | 7.36992300  | 5.16871300  |
| C  | 1.16472600  | 6.94165800  | 4.06619100  |
| C  | 0.79282500  | 7.77887400  | 3.00778000  |
| H  | 1.13656100  | 8.81349600  | 3.01466500  |
| C  | 0.00093100  | 7.27445400  | 1.98708200  |
| H  | -0.29258300 | 7.92511600  | 1.15958400  |
| C  | -0.43491500 | 5.93806400  | 1.99356600  |
| C  | -1.29280400 | 5.41652400  | 0.87168900  |
| H  | -0.77521500 | 5.51155100  | -0.09431300 |
| H  | -2.23045700 | 5.98695800  | 0.79725300  |
| H  | -1.54715000 | 4.35938800  | 1.02035200  |
| C  | -0.05417000 | 5.11910800  | 3.05959200  |
| H  | -0.38455000 | 4.07861400  | 3.08219500  |
| C  | 0.73963500  | 5.61633000  | 4.09234300  |
| H  | 1.04290800  | 4.99089700  | 4.93334100  |
| C  | 4.35935000  | 10.80269200 | 5.93036100  |
| C  | 4.39949900  | 10.95784400 | 4.53774100  |
| H  | 4.02975500  | 10.15783300 | 3.89185600  |
| C  | 4.90192200  | 12.12997300 | 3.97462100  |
| H  | 4.92848200  | 12.24283500 | 2.88936000  |
| C  | 5.37290400  | 13.15665000 | 4.79492500  |
| H  | 5.76865700  | 14.07197000 | 4.35170300  |
| C  | 5.33460700  | 13.01273900 | 6.18042100  |
| H  | 5.69852200  | 13.81451900 | 6.82519200  |
| C  | 4.82431700  | 11.84157600 | 6.74450500  |
| H  | 4.79177800  | 11.74687400 | 7.83375500  |
| C  | 5.22866100  | 7.74712300  | 6.06012300  |
| C  | 5.01533100  | 6.36928400  | 5.92488800  |

|   |            |            |            |
|---|------------|------------|------------|
| H | 4.03983000 | 5.93898100 | 6.16642300 |
| C | 6.03481400 | 5.54042600 | 5.45660500 |
| H | 5.85562800 | 4.46951400 | 5.34614600 |
| C | 7.28004000 | 6.07839600 | 5.13210500 |
| H | 8.07872700 | 5.42917300 | 4.76958500 |
| C | 7.50109700 | 7.44800900 | 5.26960800 |
| H | 8.47235300 | 7.87429100 | 5.01239900 |
| C | 6.47913700 | 8.28068200 | 5.72812300 |
| H | 6.66054400 | 9.35524500 | 5.81409100 |

-----

**NNBi-Rea**

G = -1056.951019 Hartree

-----

|    |             |             |             |
|----|-------------|-------------|-------------|
| Bi | 3.53828500  | 9.05820800  | 6.90150500  |
| N  | 2.30291000  | 8.59779600  | 5.07138500  |
| N  | 1.87250500  | 7.45189400  | 5.16314800  |
| C  | 1.09205900  | 6.97621200  | 4.04823000  |
| C  | 0.79330800  | 7.75675400  | 2.92609500  |
| H  | 1.16613800  | 8.78071100  | 2.88881200  |
| C  | 0.03569900  | 7.21169900  | 1.89989800  |
| H  | -0.20053100 | 7.81838600  | 1.02212700  |
| C  | -0.43731400 | 5.88981000  | 1.96452400  |
| C  | -1.25033800 | 5.32017200  | 0.83248600  |
| H  | -2.12971300 | 5.94726600  | 0.62518700  |
| H  | -1.59949800 | 4.30527300  | 1.06164300  |
| H  | -0.65579900 | 5.27522100  | -0.09227800 |
| C  | -0.13008800 | 5.12802600  | 3.09479000  |
| H  | -0.49115600 | 4.09976300  | 3.16375800  |
| C  | 0.62941400  | 5.66651200  | 4.13282300  |
| H  | 0.87570700  | 5.08563300  | 5.02307900  |
| C  | 4.40987500  | 10.90656400 | 5.96684000  |
| C  | 4.43019100  | 11.03846700 | 4.57289200  |
| H  | 3.99832000  | 10.25415300 | 3.94602200  |
| C  | 4.99194500  | 12.17081400 | 3.98284000  |
| H  | 5.00336500  | 12.26719400 | 2.89559800  |
| C  | 5.54046600  | 13.17791800 | 4.77843300  |
| H  | 5.98219500  | 14.06143400 | 4.31455700  |

|   |            |             |            |
|---|------------|-------------|------------|
| C | 5.52160700 | 13.05472200 | 6.16652400 |
| H | 5.94724700 | 13.84118800 | 6.79239600 |
| C | 4.95385600 | 11.92339700 | 6.75780400 |
| H | 4.94292200 | 11.84718600 | 7.84924800 |
| C | 5.18184900 | 7.73730900  | 6.10949100 |
| C | 4.91798000 | 6.37583700  | 5.92362700 |
| H | 3.92306000 | 5.97350200  | 6.13414800 |
| C | 5.91355700 | 5.52597200  | 5.43937600 |
| H | 5.69753700 | 4.46661900  | 5.28920300 |
| C | 7.18064500 | 6.02972800  | 5.14639900 |
| H | 7.95984700 | 5.36479000  | 4.77012900 |
| C | 7.44831700 | 7.38580800  | 5.33006800 |
| H | 8.43654800 | 7.78522700  | 5.09474700 |
| C | 6.45118400 | 8.23916100  | 5.80643000 |
| H | 6.66789500 | 9.30423500  | 5.92652800 |

-----

### Cyclooctyne

G = -311.467791 Hartree

-----

|   |             |             |             |
|---|-------------|-------------|-------------|
| C | 0.59381900  | -0.26249000 | -0.23951600 |
| H | 1.60667500  | -0.41025100 | 0.16875100  |
| H | 0.40720400  | 0.82238200  | -0.22287900 |
| C | -0.42284800 | -0.93901000 | 0.70617500  |
| H | -1.44261200 | -0.58654900 | 0.48267600  |
| H | -0.21558700 | -0.67371700 | 1.75307500  |
| C | -0.33307900 | -2.37762700 | 0.45589700  |
| C | -0.05954100 | -3.39684300 | -0.13673000 |
| C | 0.50369700  | -4.24103700 | -1.19048700 |
| H | 1.45109100  | -4.68427800 | -0.84396300 |
| H | -0.15656100 | -5.07546300 | -1.46821000 |
| C | 0.75881800  | -3.32009600 | -2.40388100 |
| H | 1.36549500  | -3.87689200 | -3.13459500 |
| H | -0.20495600 | -3.11027300 | -2.89527100 |
| C | 1.45526200  | -1.98255800 | -2.07459500 |
| H | 2.20275100  | -2.15196500 | -1.28079100 |
| H | 2.03362200  | -1.70048400 | -2.96684000 |
| C | 0.56354300  | -0.76400100 | -1.69896300 |

|   |             |             |             |
|---|-------------|-------------|-------------|
| H | 0.88244000  | 0.07974000  | -2.32868000 |
| H | -0.48173100 | -0.96801300 | -1.98760600 |

---

**NNP-TS**

G = -1495.139626 Hartree

---

|   |             |             |             |
|---|-------------|-------------|-------------|
| P | 0.00000000  | 0.00000000  | 0.00000000  |
| C | 0.00000000  | 0.00000000  | 1.82352600  |
| C | 1.74306500  | 0.00000000  | -0.51764700 |
| C | -1.22808800 | -0.10587500 | 2.49353900  |
| C | 1.18759000  | 0.03728000  | 2.56909700  |
| N | -0.61016700 | -1.38638900 | -0.65960600 |
| C | 2.30897500  | -1.08452200 | -1.20052400 |
| C | 2.50733700  | 1.15660100  | -0.30947600 |
| C | -1.26025500 | -0.16825400 | 3.88594200  |
| H | -2.15169700 | -0.14784000 | 1.91787400  |
| C | 1.14433900  | -0.00955100 | 3.96032700  |
| H | 2.15300600  | 0.09299600  | 2.06451800  |
| N | -1.79626400 | -1.67494800 | -0.29081300 |
| C | 3.62716200  | -1.01360200 | -1.64674200 |
| H | 1.70470300  | -1.97490400 | -1.37616900 |
| C | 3.82823600  | 1.21763200  | -0.74849400 |
| H | 2.06776600  | 2.01626100  | 0.20454500  |
| C | -0.07888100 | -0.11219300 | 4.62286100  |
| H | -2.22013600 | -0.25834700 | 4.39678600  |
| H | 2.07496000  | 0.02551800  | 4.52883000  |
| C | -2.44530400 | -2.60949000 | -1.14577600 |
| C | 4.39053900  | 0.13180500  | -1.41919700 |
| H | 4.06360400  | -1.86441400 | -2.17246600 |
| H | 4.41635500  | 2.11989700  | -0.57439600 |
| H | -0.10949300 | -0.15254300 | 5.71278400  |
| C | -2.05094200 | -2.83662500 | -2.47216800 |
| C | -3.54845000 | -3.29219800 | -0.63174500 |
| H | 5.42291000  | 0.18013700  | -1.76864500 |
| C | -2.76439300 | -3.72753800 | -3.26163900 |
| H | -1.19021400 | -2.29097000 | -2.85965800 |
| C | -4.25761100 | -4.18538500 | -1.43395400 |

|   |             |             |             |
|---|-------------|-------------|-------------|
| H | -3.83122600 | -3.11264600 | 0.40691400  |
| C | -3.88093300 | -4.41653700 | -2.75975400 |
| H | -2.45921500 | -3.89220400 | -4.29814500 |
| H | -5.11933700 | -4.71451000 | -1.02129400 |
| C | -4.63499300 | -5.38422500 | -3.63303200 |
| H | -5.54963600 | -5.73801600 | -3.13999200 |
| H | -4.91808900 | -4.91768900 | -4.58770900 |
| H | -4.01640300 | -6.26328100 | -3.86969600 |
| C | -2.85540000 | 0.30143600  | -0.53297400 |
| C | -4.24969500 | -0.01393400 | -0.88854600 |
| C | -1.95945900 | 1.16584900  | -0.45375600 |
| C | -4.43833100 | 0.03859100  | -2.42414600 |
| H | -4.89350100 | 0.74083200  | -0.40643600 |
| H | -4.57662200 | -0.99277400 | -0.50939700 |
| C | -1.69598200 | 2.60620700  | -0.72129800 |
| C | -3.50632900 | 1.01992100  | -3.14666100 |
| H | -4.26625500 | -0.96747400 | -2.83872800 |
| H | -5.49156900 | 0.28764400  | -2.63022200 |
| C | -2.08258800 | 2.97029900  | -2.16688800 |
| H | -2.30871900 | 3.20281600  | -0.02483000 |
| H | -0.64587100 | 2.87932400  | -0.53307900 |
| C | -3.47291300 | 2.47033600  | -2.60273400 |
| H | -3.79169500 | 1.03212700  | -4.20976800 |
| H | -2.48779900 | 0.60350900  | -3.11540300 |
| H | -2.03334200 | 4.06637900  | -2.26137800 |
| H | -1.32413700 | 2.56551400  | -2.85704300 |
| H | -3.85205700 | 3.15104800  | -3.37925800 |
| H | -4.17022800 | 2.57752400  | -1.75384100 |

-----

**PPP-TS**

G = -2068.294794 Hartree

-----

|   |             |             |             |
|---|-------------|-------------|-------------|
| P | 0.00000000  | 0.00000000  | 0.00000000  |
| C | 0.00000000  | 0.00000000  | 1.83680600  |
| C | 1.78786000  | 0.00000000  | -0.43087100 |
| C | -0.47930400 | 1.12399500  | 2.51533200  |
| C | 0.48566700  | -1.09064700 | 2.57223600  |

|   |             |             |             |
|---|-------------|-------------|-------------|
| P | -0.71060200 | -1.90157200 | -0.74009700 |
| C | 2.14950900  | -0.26465500 | -1.76061500 |
| C | 2.78690600  | 0.34494000  | 0.48739100  |
| C | -0.46279700 | 1.16656100  | 3.91050200  |
| H | -0.87535600 | 1.96799100  | 1.94668600  |
| C | 0.50146700  | -1.04729600 | 3.96320700  |
| H | 0.84375100  | -1.97762400 | 2.04438600  |
| P | -2.36175800 | -1.89779800 | 0.49727200  |
| C | 3.48310000  | -0.21334000 | -2.15500400 |
| H | 1.37737100  | -0.52158600 | -2.49098400 |
| C | 4.12180300  | 0.40504600  | 0.08518300  |
| H | 2.52528400  | 0.56364500  | 1.52434100  |
| C | 0.02791400  | 0.08245000  | 4.63419300  |
| H | -0.83947900 | 2.04835100  | 4.43090600  |
| H | 0.88049900  | -1.90053700 | 4.52787400  |
| C | -3.53094700 | -2.95426700 | -0.44903400 |
| C | 4.47529300  | 0.12302200  | -1.23245500 |
| H | 3.74908500  | -0.43319600 | -3.19023000 |
| H | 4.89031900  | 0.67179700  | 0.81264700  |
| H | 0.03777900  | 0.11312500  | 5.72494600  |
| C | -3.59057000 | -3.01890200 | -1.85124300 |
| C | -4.49294500 | -3.66249500 | 0.28584900  |
| H | 5.52031700  | 0.16781600  | -1.54239300 |
| C | -4.56199600 | -3.78470200 | -2.48574100 |
| H | -2.87222100 | -2.44883600 | -2.44530500 |
| C | -5.46613000 | -4.42701700 | -0.35519000 |
| H | -4.47771200 | -3.61319100 | 1.37807000  |
| C | -5.51570600 | -4.50332300 | -1.75042100 |
| H | -4.59241100 | -3.81816000 | -3.57766400 |
| H | -6.20286900 | -4.97249500 | 0.23880400  |
| C | -6.55490100 | -5.33504300 | -2.45354700 |
| H | -7.33626800 | -5.67003100 | -1.75933700 |
| H | -7.03298600 | -4.76782300 | -3.26473600 |
| H | -6.09752900 | -6.22891600 | -2.90460100 |
| C | -3.28306700 | 0.42950300  | 0.08845700  |
| C | -4.73476800 | 0.14207600  | 0.24077800  |
| C | -2.44891300 | 1.27384200  | -0.25675500 |
| C | -5.45769900 | 0.16301900  | -1.12689700 |

|   |             |             |             |
|---|-------------|-------------|-------------|
| H | -5.13753400 | 0.93642900  | 0.88952500  |
| H | -4.93515600 | -0.80809700 | 0.75588000  |
| C | -2.10159500 | 2.59359000  | -0.82276000 |
| C | -4.81036300 | 1.06653900  | -2.18266300 |
| H | -5.49003500 | -0.86201400 | -1.52886700 |
| H | -6.50353600 | 0.46240800  | -0.95219300 |
| C | -3.06169200 | 2.96347900  | -1.97778100 |
| H | -2.20092800 | 3.33877400  | -0.01406100 |
| H | -1.05994500 | 2.63982800  | -1.16627900 |
| C | -4.52372300 | 2.53118700  | -1.76809100 |
| H | -5.45413800 | 1.05630300  | -3.07568400 |
| H | -3.86525100 | 0.59421600  | -2.49085900 |
| H | -3.00393700 | 4.05311700  | -2.12202000 |
| H | -2.69177800 | 2.50951300  | -2.91085500 |
| H | -5.17060900 | 3.20489700  | -2.34912700 |
| H | -4.79846300 | 2.69468200  | -0.71202900 |

-----

**AsAsP-TS**

G = -5857.083139 Hartree

-----

|    |             |             |             |
|----|-------------|-------------|-------------|
| P  | -0.10636300 | 0.00196100  | 0.05188200  |
| C  | -0.11248000 | -0.35527200 | 1.85503300  |
| C  | 1.64672200  | 0.39507300  | -0.32909700 |
| C  | -1.14706100 | 0.16325100  | 2.63962000  |
| C  | 0.85340000  | -1.17944800 | 2.45373100  |
| As | -0.49373700 | -1.97095000 | -1.03104300 |
| C  | 2.09809200  | 0.26750600  | -1.65154200 |
| C  | 2.50773000  | 0.95262400  | 0.62613000  |
| C  | -1.21376400 | -0.12861800 | 4.00415700  |
| H  | -1.91608600 | 0.78584800  | 2.17578900  |
| C  | 0.79035500  | -1.46099600 | 3.81416100  |
| H  | 1.65329200  | -1.60385200 | 1.84230200  |
| As | -2.51176000 | -2.13701800 | 0.02725800  |
| C  | 3.38803800  | 0.65675400  | -2.00197800 |
| H  | 1.43248000  | -0.14530600 | -2.41499700 |
| C  | 3.79742100  | 1.34670100  | 0.26994000  |
| H  | 2.17199200  | 1.07776300  | 1.65732600  |



|   |             |             |             |
|---|-------------|-------------|-------------|
| C | -0.24458400 | -0.93520900 | 4.59288700  |
| H | -2.02924900 | 0.27725400  | 4.60456200  |
| H | 1.54573700  | -2.10324700 | 4.26979500  |
| C | -3.41472900 | -3.43560700 | -1.12755100 |
| C | 4.24427100  | 1.19661500  | -1.04147300 |
| H | 3.72541800  | 0.53959100  | -3.03305500 |
| H | 4.45687800  | 1.77394400  | 1.02725400  |
| H | -0.29556900 | -1.16322500 | 5.65874000  |
| C | -3.07069800 | -3.73004700 | -2.45646100 |
| C | -4.51945000 | -4.09324900 | -0.57064300 |
| H | 5.25440500  | 1.50331900  | -1.31643000 |
| C | -3.80001200 | -4.65886900 | -3.18917600 |
| H | -2.22362200 | -3.22104700 | -2.92415200 |
| C | -5.25144700 | -5.02182400 | -1.31134900 |
| H | -4.81197600 | -3.88101600 | 0.46138100  |
| C | -4.90409700 | -5.32059500 | -2.63090100 |
| H | -3.51343400 | -4.87450100 | -4.22158300 |
| H | -6.10712900 | -5.52361200 | -0.85395300 |
| C | -5.68631400 | -6.31673400 | -3.44445600 |
| H | -6.50567700 | -6.75484000 | -2.86036600 |
| H | -6.11888100 | -5.84098300 | -4.33709800 |
| H | -5.03778000 | -7.13432400 | -3.79210500 |
| C | -3.41223000 | 0.17539300  | -0.61539900 |
| C | -4.52060400 | -0.17549000 | -1.54511100 |
| C | -2.66447900 | 1.10427500  | -0.28518900 |
| C | -3.99485100 | -0.16208100 | -3.00244200 |
| H | -5.30002300 | 0.59280000  | -1.41719300 |
| H | -4.99268700 | -1.14430900 | -1.32788600 |
| C | -2.24223000 | 2.51311100  | -0.40969100 |
| C | -2.82674800 | 0.79494000  | -3.28156300 |
| H | -3.66315500 | -1.17816100 | -3.26610500 |
| H | -4.84624800 | 0.06563100  | -3.66399900 |
| C | -1.93260300 | 2.80453800  | -1.89067600 |
| H | -3.08680900 | 3.14527900  | -0.08466400 |
| H | -1.38258100 | 2.76615400  | 0.22552700  |
| C | -3.00522500 | 2.27649600  | -2.86327800 |
| H | -2.61621500 | 0.74439100  | -4.36100400 |
| H | -1.93146400 | 0.38853200  | -2.78523100 |

|   |             |            |             |
|---|-------------|------------|-------------|
| H | -1.81817400 | 3.89355600 | -2.00341200 |
| H | -0.95716800 | 2.35767200 | -2.14622700 |
| H | -2.99121000 | 2.90644600 | -3.76468200 |
| H | -4.00127800 | 2.43251300 | -2.41293400 |

-----

**SbSbP-TS**

G = -1866.188195 Hartree

-----

|    |             |             |             |
|----|-------------|-------------|-------------|
| P  | -0.01017000 | -0.01732900 | 0.11025800  |
| C  | 0.03908400  | -0.34402200 | 1.92077700  |
| C  | 1.69432200  | 0.53226500  | -0.29897200 |
| C  | -1.04152600 | 0.08952700  | 2.69739000  |
| C  | 1.07701600  | -1.05787800 | 2.54087800  |
| Sb | -0.27495100 | -2.25611200 | -1.02237000 |
| C  | 2.12661300  | 0.45583400  | -1.63274700 |
| C  | 2.52681800  | 1.15871800  | 0.63975800  |
| C  | -1.08763500 | -0.18206200 | 4.06726900  |
| H  | -1.86187700 | 0.63593200  | 2.22299000  |
| C  | 1.03738200  | -1.31490900 | 3.90694500  |
| H  | 1.91522700  | -1.41849500 | 1.93973000  |
| Sb | -2.65541100 | -2.27961100 | 0.21633200  |
| C  | 3.36618600  | 0.96426600  | -2.01077100 |
| H  | 1.48385500  | -0.01054100 | -2.38561900 |
| C  | 3.76692200  | 1.66962100  | 0.25706100  |
| H  | 2.20642400  | 1.24817700  | 1.67943500  |
| C  | -0.04723500 | -0.87883300 | 4.67398300  |
| H  | -1.94066200 | 0.15592000  | 4.65752500  |
| H  | 1.85041600  | -1.87084400 | 4.37677100  |
| C  | -3.71330000 | -3.64543100 | -1.09696900 |
| C  | 4.19408400  | 1.57164700  | -1.06585400 |
| H  | 3.68678000  | 0.88578200  | -3.05088400 |
| H  | 4.40333100  | 2.14869700  | 1.00310700  |
| H  | -0.07968300 | -1.08999500 | 5.74397800  |
| C  | -3.32422800 | -3.95999700 | -2.40828900 |
| C  | -4.89034300 | -4.22568800 | -0.60521900 |
| H  | 5.16574700  | 1.96989500  | -1.36124200 |
| C  | -4.08048200 | -4.82859800 | -3.18880700 |

|   |             |             |             |
|---|-------------|-------------|-------------|
| H | -2.41741300 | -3.51688700 | -2.83075700 |
| C | -5.64901300 | -5.09415900 | -1.39175300 |
| H | -5.22823600 | -4.00446500 | 0.41142100  |
| C | -5.25735400 | -5.40933100 | -2.69522300 |
| H | -3.75500900 | -5.06076000 | -4.20613100 |
| H | -6.56142500 | -5.53524900 | -0.98361000 |
| C | -6.07162900 | -6.33550000 | -3.55897600 |
| H | -6.91179900 | -6.76777000 | -3.00053800 |
| H | -6.48055900 | -5.80075900 | -4.42938400 |
| H | -5.45351300 | -7.15995900 | -3.94302300 |
| C | -3.40412800 | 0.04962500  | -0.66789000 |
| C | -4.41803600 | -0.24809100 | -1.73037500 |
| C | -2.70959700 | 1.00439300  | -0.28799600 |
| C | -3.72829500 | -0.24039700 | -3.11378100 |
| H | -5.17605000 | 0.54934800  | -1.67761600 |
| H | -4.94735700 | -1.20055100 | -1.58540700 |
| C | -2.28238300 | 2.41247500  | -0.34134000 |
| C | -2.55856400 | 0.74187000  | -3.27394800 |
| H | -3.34177200 | -1.25125500 | -3.31882100 |
| H | -4.50567900 | -0.04671900 | -3.87058900 |
| C | -1.83499400 | 2.74060900  | -1.77931400 |
| H | -3.15943800 | 3.03097600  | -0.08123700 |
| H | -1.48994300 | 2.65100300  | 0.38011600  |
| C | -2.79783300 | 2.21652300  | -2.86214800 |
| H | -2.24634600 | 0.70429600  | -4.32885600 |
| H | -1.70581300 | 0.34641100  | -2.70022700 |
| H | -1.73219700 | 3.83379000  | -1.85496200 |
| H | -0.83087000 | 2.31664000  | -1.94626100 |
| H | -2.69630800 | 2.85736100  | -3.74995500 |
| H | -3.83679900 | 2.36010300  | -2.51648400 |

-----

**BiBiP-TS**

G = -1814.848846 Hartree

-----

|   |            |             |             |
|---|------------|-------------|-------------|
| P | 0.04097300 | -0.03174500 | 0.09867800  |
| C | 0.05124400 | -0.33700900 | 1.91518600  |
| C | 1.72954400 | 0.59532900  | -0.25486600 |

|    |             |             |             |
|----|-------------|-------------|-------------|
| C  | -1.02363700 | 0.13289600  | 2.67950900  |
| C  | 1.06247000  | -1.07380900 | 2.55395400  |
| Bi | -0.11841800 | -2.37256700 | -1.05564000 |
| C  | 2.17732000  | 0.58023300  | -1.58668500 |
| C  | 2.53955000  | 1.20377100  | 0.71523300  |
| C  | -1.09180200 | -0.12805500 | 4.05109000  |
| H  | -1.82164200 | 0.70222400  | 2.19487100  |
| C  | 1.00259800  | -1.31924100 | 3.92127400  |
| H  | 1.89604700  | -1.46220000 | 1.96369300  |
| Bi | -2.60410800 | -2.33740200 | 0.29495500  |
| C  | 3.40761300  | 1.13103200  | -1.93304100 |
| H  | 1.55114200  | 0.12840700  | -2.36259800 |
| C  | 3.77059400  | 1.75779700  | 0.36423600  |
| H  | 2.20813800  | 1.24499900  | 1.75442200  |
| C  | -0.07815900 | -0.84932000 | 4.67394800  |
| H  | -1.94051700 | 0.23916600  | 4.63015800  |
| H  | 1.79605600  | -1.89251300 | 4.40363100  |
| C  | -3.76649500 | -3.71402900 | -1.08631300 |
| C  | 4.21226700  | 1.72102800  | -0.95704800 |
| H  | 3.73955100  | 1.10049400  | -2.97215100 |
| H  | 4.38888900  | 2.22250100  | 1.13429100  |
| H  | -0.12781000 | -1.05207600 | 5.74491900  |
| C  | -3.37243400 | -4.03952600 | -2.39198900 |
| C  | -4.97193100 | -4.24646500 | -0.61312800 |
| H  | 5.17676300  | 2.15322100  | -1.22710400 |
| C  | -4.15297700 | -4.87354900 | -3.18810500 |
| H  | -2.44302300 | -3.63045200 | -2.80108400 |
| C  | -5.75538800 | -5.08055300 | -1.41409600 |
| H  | -5.31818600 | -4.01725400 | 0.39938600  |
| C  | -5.35922300 | -5.40702600 | -2.71343200 |
| H  | -3.82348300 | -5.11502600 | -4.20218000 |
| H  | -6.69110700 | -5.48532700 | -1.02074200 |
| C  | -6.20071000 | -6.29417000 | -3.59264700 |
| H  | -5.60771200 | -7.12921300 | -3.99295700 |
| H  | -7.05235600 | -6.71203300 | -3.04043400 |
| H  | -6.59631600 | -5.73254100 | -4.45235700 |
| C  | -3.31987100 | 0.03717500  | -0.65381300 |
| C  | -4.39331500 | -0.24542700 | -1.66019800 |

|   |             |             |             |
|---|-------------|-------------|-------------|
| C | -2.57662400 | 0.97615300  | -0.32563300 |
| C | -3.76654400 | -0.30157600 | -3.07241500 |
| H | -5.11895700 | 0.58141000  | -1.59770700 |
| H | -4.95027300 | -1.17366700 | -1.46861500 |
| C | -2.15127100 | 2.38368200  | -0.44485600 |
| C | -2.57127300 | 0.63221400  | -3.31112000 |
| H | -3.42750600 | -1.33177800 | -3.26435800 |
| H | -4.56954500 | -0.09888100 | -3.79959200 |
| C | -1.73762900 | 2.65469400  | -1.90322800 |
| H | -3.02384600 | 3.01153600  | -0.19151400 |
| H | -1.34340800 | 2.65046700  | 0.24863600  |
| C | -2.74684000 | 2.12647300  | -2.94067500 |
| H | -2.30380800 | 0.55005100  | -4.37576300 |
| H | -1.71009900 | 0.22536000  | -2.75819000 |
| H | -1.60758800 | 3.74182000  | -2.01643200 |
| H | -0.75027500 | 2.19828700  | -2.08502300 |
| H | -2.65016800 | 2.73475600  | -3.85167000 |
| H | -3.77013800 | 2.31676100  | -2.57129500 |

-----

**NNN-TS**

G = -1208.549039 Hartree

-----

|   |             |             |             |
|---|-------------|-------------|-------------|
| N | 1.26926500  | 0.10686700  | 0.28006600  |
| N | -0.76074100 | 0.72624800  | 0.11532200  |
| C | -0.69020700 | -0.13246700 | -1.44134400 |
| C | 0.50373900  | -0.47115200 | -1.69412900 |
| C | 1.87718800  | 1.42200800  | 0.08783100  |
| C | 2.15834200  | -0.95982400 | 0.64570700  |
| C | 1.59815200  | 2.22639200  | -1.01014200 |
| C | 2.69872700  | 1.89184300  | 1.11795800  |
| N | 0.07353700  | 0.05955700  | 0.87557400  |
| C | 1.71859300  | -2.00103700 | 1.46852900  |
| C | 3.44737400  | -0.99385500 | 0.10384700  |
| C | 2.16815500  | 3.49962300  | -1.08893300 |
| H | 0.93843500  | 1.85250700  | -1.78969700 |
| C | 3.26874300  | 3.15673800  | 1.02863400  |
| H | 2.88481000  | 1.25663200  | 1.98561700  |

|   |             |             |             |
|---|-------------|-------------|-------------|
| C | 2.57406100  | -3.06476300 | 1.74573700  |
| H | 0.70960500  | -1.96385000 | 1.87190800  |
| C | 4.28709200  | -2.07049500 | 0.37948300  |
| H | 3.78952900  | -0.17920000 | -0.53505600 |
| C | 3.00624500  | 3.96450800  | -0.08009600 |
| H | 1.94678400  | 4.13120400  | -1.95042600 |
| H | 3.91327100  | 3.51661500  | 1.83170600  |
| C | -2.07201600 | 0.82359600  | 0.66025000  |
| C | 3.85674300  | -3.11156800 | 1.20054300  |
| H | 2.22630100  | -3.87117900 | 2.39315300  |
| H | 5.28794000  | -2.09093000 | -0.05406200 |
| H | 3.45019800  | 4.95850000  | -0.15027800 |
| C | -2.51346600 | 0.06307000  | 1.75147800  |
| C | -2.94193400 | 1.74802000  | 0.08041200  |
| H | 4.51666500  | -3.95295200 | 1.41439100  |
| C | -3.81050900 | 0.21967500  | 2.22495200  |
| H | -1.82524700 | -0.64091100 | 2.21731300  |
| C | -4.24472900 | 1.88693400  | 0.55571900  |
| H | -2.57551000 | 2.35881300  | -0.74648700 |
| C | -4.70272000 | 1.12687700  | 1.63506500  |
| H | -4.14476000 | -0.37899000 | 3.07608500  |
| H | -4.91435700 | 2.61053800  | 0.08566500  |
| C | -6.10028200 | 1.28655200  | 2.17344900  |
| H | -6.71070600 | 1.91993000  | 1.51670100  |
| H | -6.60071000 | 0.31236900  | 2.27188400  |
| H | -6.08709400 | 1.74988800  | 3.17175100  |
| C | -2.01120800 | -0.56039500 | -1.98911700 |
| C | -2.43062700 | -1.91815300 | -1.38629300 |
| H | -1.89429500 | -0.65953100 | -3.08008400 |
| H | -2.81050100 | 0.17514800  | -1.82550700 |
| C | 1.36009800  | -1.32592900 | -2.53399700 |
| C | -1.28238500 | -2.91339400 | -1.17399800 |
| H | -2.92040400 | -1.74313800 | -0.41528700 |
| H | -3.19607600 | -2.35951900 | -2.04577200 |
| C | 1.08046100  | -2.81906200 | -2.28346000 |
| H | 1.15180400  | -1.09389200 | -3.59456600 |
| H | 2.43296900  | -1.12364900 | -2.37897600 |
| C | -0.39947400 | -3.21761700 | -2.40905000 |

|   |             |             |             |
|---|-------------|-------------|-------------|
| H | -1.72485900 | -3.85068100 | -0.80324600 |
| H | -0.64344500 | -2.54058800 | -0.35778800 |
| H | 1.67897000  | -3.39766500 | -3.00460600 |
| H | 1.45027600  | -3.09197500 | -1.28043900 |
| H | -0.43764100 | -4.29790200 | -2.61335300 |
| H | -0.82245700 | -2.73736500 | -3.30907600 |

-----

**NNAs-TS**

G = -3389.511988 Hartree

-----

|    |             |             |             |
|----|-------------|-------------|-------------|
| As | 0.00000000  | 0.00000000  | 0.00000000  |
| C  | 0.00000000  | 0.00000000  | 1.96496000  |
| C  | 1.98953000  | 0.00000000  | -0.13137600 |
| C  | -0.81328300 | -0.85836600 | 2.70994200  |
| C  | 0.84012500  | 0.89879000  | 2.63671300  |
| N  | 0.06685900  | -1.90227300 | -0.47346800 |
| C  | 2.81482200  | -0.99395800 | 0.41195900  |
| C  | 2.58191200  | 1.08151100  | -0.78710300 |
| C  | -0.79229400 | -0.81291300 | 4.10617300  |
| H  | -1.46532300 | -1.56689700 | 2.19723700  |
| C  | 0.84598800  | 0.95406200  | 4.02820400  |
| H  | 1.50185800  | 1.55627900  | 2.06751400  |
| N  | -0.91701600 | -2.60469200 | -0.36459600 |
| C  | 4.19975600  | -0.90257300 | 0.30195900  |
| H  | 2.36694700  | -1.84684100 | 0.92770300  |
| C  | 3.97264300  | 1.18088000  | -0.89548800 |
| H  | 1.94896900  | 1.86031600  | -1.22319800 |
| C  | 0.02923700  | 0.09636700  | 4.76745800  |
| H  | -1.42496600 | -1.49468000 | 4.67730700  |
| H  | 1.49655100  | 1.66649700  | 4.53825100  |
| C  | -0.81784900 | -3.95824200 | -0.83083900 |
| C  | 4.78177000  | 0.18758300  | -0.35131400 |
| H  | 4.83238800  | -1.68263300 | 0.72985200  |
| H  | 4.42103000  | 2.03309900  | -1.40950700 |
| H  | 0.03915900  | 0.13527200  | 5.85793900  |
| C  | -0.07294300 | -4.27614500 | -1.96843200 |
| C  | -1.48212800 | -4.95188700 | -0.11636000 |

|   |             |             |             |
|---|-------------|-------------|-------------|
| H | 5.86766600  | 0.25866400  | -0.43472100 |
| C | -0.01040200 | -5.59793900 | -2.39089600 |
| H | 0.44868700  | -3.47723000 | -2.49682000 |
| C | -1.39517700 | -6.27550700 | -0.54202200 |
| H | -2.04925300 | -4.67947500 | 0.77566800  |
| C | -0.66766800 | -6.61813000 | -1.68681500 |
| H | 0.56485600  | -5.84981000 | -3.28469300 |
| H | -1.90395100 | -7.05750000 | 0.02494700  |
| C | -0.59250900 | -8.04291300 | -2.16704400 |
| H | -1.05013500 | -8.73258800 | -1.44656300 |
| H | -1.11574500 | -8.15888000 | -3.12797400 |
| H | 0.45136100  | -8.35040200 | -2.32311600 |
| C | -2.65793800 | -1.64649000 | -0.27521000 |
| C | -3.64005600 | -2.50604500 | -0.97486800 |
| C | -2.39037500 | -0.47565300 | 0.08316700  |
| C | -3.69375000 | -2.16444700 | -2.48002600 |
| H | -4.61557900 | -2.28719400 | -0.51057700 |
| H | -3.47203600 | -3.58189600 | -0.83924800 |
| C | -3.04252800 | 0.85332500  | 0.18505700  |
| C | -3.46174400 | -0.68290800 | -2.80544200 |
| H | -2.93167400 | -2.75726900 | -3.01225300 |
| H | -4.66958200 | -2.49585100 | -2.87035100 |
| C | -3.50019900 | 1.35822600  | -1.19523900 |
| H | -3.91809600 | 0.76651800  | 0.84992700  |
| H | -2.36574400 | 1.59919100  | 0.63956100  |
| C | -4.31289500 | 0.34162700  | -2.01534200 |
| H | -3.63071800 | -0.54897500 | -3.88482600 |
| H | -2.39669100 | -0.45759700 | -2.64136300 |
| H | -4.09414200 | 2.27257400  | -1.04009800 |
| H | -2.61271700 | 1.65950400  | -1.77613000 |
| H | -4.94481000 | 0.89958500  | -2.72204100 |
| H | -5.01705600 | -0.17743600 | -1.34234800 |

-----

**NNSb-TS**

G = -1394.066619 Hartree

-----

|    |            |             |             |
|----|------------|-------------|-------------|
| Sb | 0.17346200 | -0.00113600 | -0.14710200 |
|----|------------|-------------|-------------|



|   |             |             |             |
|---|-------------|-------------|-------------|
| C | 0.05764600  | -0.05412100 | 2.01581400  |
| C | 2.35882400  | -0.10460100 | -0.09790000 |
| C | -0.85854700 | -0.86004600 | 2.70058900  |
| C | 0.92930200  | 0.75819300  | 2.75408300  |
| N | 0.32149600  | -2.20720100 | -0.37588800 |
| C | 3.07073800  | -1.13951000 | 0.52447800  |
| C | 3.07789100  | 0.94351100  | -0.68240800 |
| C | -0.90965900 | -0.84429800 | 4.09647800  |
| H | -1.53460400 | -1.51104400 | 2.14128400  |
| C | 0.87115400  | 0.78093000  | 4.14667600  |
| H | 1.67424200  | 1.37298000  | 2.24079500  |
| N | -0.66668800 | -2.88617200 | -0.48564600 |
| C | 4.46371900  | -1.12121700 | 0.56330800  |
| H | 2.52783800  | -1.97153200 | 0.97960200  |
| C | 4.47525400  | 0.96829700  | -0.64474500 |
| H | 2.54586000  | 1.76066300  | -1.18096600 |
| C | -0.05042800 | -0.02085400 | 4.82103500  |
| H | -1.62421100 | -1.48334600 | 4.61866500  |
| H | 1.55356600  | 1.42202300  | 4.70755300  |
| C | -0.50310800 | -4.30816600 | -0.63014400 |
| C | 5.16858400  | -0.06583200 | -0.02083400 |
| H | 5.00547900  | -1.93235400 | 1.05390800  |
| H | 5.02048100  | 1.79413200  | -1.10579300 |
| H | -0.09279200 | -0.00797700 | 5.91145400  |
| C | 0.55607100  | -4.84001600 | -1.36736000 |
| C | -1.42634800 | -5.14482100 | -0.00750000 |
| H | 6.25955400  | -0.05248300 | 0.01125800  |
| C | 0.67387800  | -6.21923200 | -1.48829000 |
| H | 1.27321300  | -4.15757200 | -1.82518500 |
| C | -1.28274100 | -6.52576300 | -0.12036600 |
| H | -2.23685600 | -4.70519800 | 0.57706100  |
| C | -0.24063200 | -7.08395600 | -0.86907700 |
| H | 1.49777700  | -6.63932900 | -2.06968400 |
| H | -1.99476100 | -7.18354700 | 0.38211400  |
| C | -0.10877500 | -8.57531100 | -1.02788400 |
| H | -0.69268000 | -9.11108000 | -0.26847600 |
| H | -0.47083100 | -8.89478500 | -2.01719800 |
| H | 0.94034300  | -8.89091500 | -0.94449300 |

|   |             |             |             |
|---|-------------|-------------|-------------|
| C | -2.54802100 | -1.88615000 | -0.60963900 |
| C | -3.39150400 | -2.78423600 | -1.42606900 |
| C | -2.36145700 | -0.75114300 | -0.13166400 |
| C | -3.61410000 | -2.21184600 | -2.84791500 |
| H | -4.35957100 | -2.86522300 | -0.90353300 |
| H | -2.99702400 | -3.80542300 | -1.49928600 |
| C | -3.04955900 | 0.53663100  | 0.14525100  |
| C | -3.57765700 | -0.68312900 | -2.94974400 |
| H | -2.84100700 | -2.61362000 | -3.52115900 |
| H | -4.57620500 | -2.59848500 | -3.21999500 |
| C | -3.71384300 | 1.12811500  | -1.11201700 |
| H | -3.82223800 | 0.33439600  | 0.90551600  |
| H | -2.36978200 | 1.28575500  | 0.58958700  |
| C | -4.47661300 | 0.10278900  | -1.96581900 |
| H | -3.83658900 | -0.41147900 | -3.98463500 |
| H | -2.53543800 | -0.35817300 | -2.81066900 |
| H | -4.39132100 | 1.93304000  | -0.78727300 |
| H | -2.94160900 | 1.60744100  | -1.73595900 |
| H | -5.25720800 | 0.63167000  | -2.53230600 |
| H | -5.01579300 | -0.58875300 | -1.29561000 |

-----

### NNBi-TS

G = -1368.383713 Hartree

-----

|    |             |             |             |
|----|-------------|-------------|-------------|
| Bi | 0.00000000  | 0.00000000  | 0.00000000  |
| C  | 0.00000000  | 0.00000000  | 2.25864700  |
| C  | 2.28615400  | 0.00000000  | -0.04355700 |
| C  | -0.89878200 | -0.77713400 | 2.99651500  |
| C  | 0.91658500  | 0.81175200  | 2.93763300  |
| N  | 0.34836100  | -2.33660800 | -0.02559700 |
| C  | 3.06712100  | -0.96113200 | 0.61063300  |
| C  | 2.93095600  | 1.04119100  | -0.71910000 |
| C  | -0.88953900 | -0.73163600 | 4.39268200  |
| H  | -1.60558700 | -1.43215700 | 2.48007800  |
| C  | 0.92040600  | 0.86170100  | 4.33198200  |
| H  | 1.65007700  | 1.40198200  | 2.38061500  |
| N  | -0.58784800 | -3.07926600 | -0.11419300 |

|   |             |             |             |
|---|-------------|-------------|-------------|
| C | 4.45923100  | -0.87815600 | 0.59020400  |
| H | 2.58100700  | -1.78728600 | 1.13549000  |
| C | 4.32625000  | 1.12969600  | -0.74241000 |
| H | 2.34690900  | 1.80606100  | -1.24326300 |
| C | 0.01549000  | 0.09056200  | 5.06168400  |
| H | -1.59114500 | -1.34693200 | 4.95930200  |
| H | 1.63890700  | 1.49970200  | 4.84993300  |
| C | -0.35694600 | -4.50207700 | -0.06797000 |
| C | 5.09103100  | 0.16795500  | -0.08611600 |
| H | 5.05702200  | -1.63231000 | 1.10630800  |
| H | 4.81421000  | 1.94889200  | -1.27438000 |
| H | 0.02193200  | 0.12506600  | 6.15247500  |
| C | 0.73827200  | -5.06886400 | -0.71909800 |
| C | -1.24571200 | -5.29574200 | 0.65293900  |
| H | 6.18060400  | 0.23179200  | -0.10030800 |
| C | 0.92809700  | -6.44479900 | -0.65627500 |
| H | 1.42857800  | -4.41597900 | -1.25479900 |
| C | -1.03025400 | -6.66976700 | 0.72379400  |
| H | -2.08654000 | -4.82626700 | 1.16737700  |
| C | 0.04975100  | -7.26702800 | 0.06319200  |
| H | 1.78196300  | -6.89323800 | -1.16914000 |
| H | -1.71498700 | -7.29182200 | 1.30390500  |
| C | 0.25444100  | -8.75826900 | 0.10271900  |
| H | -0.24432400 | -9.20646600 | 0.97190500  |
| H | -0.15924500 | -9.23203400 | -0.80097000 |
| H | 1.32244500  | -9.01117600 | 0.14759200  |
| C | -2.52369100 | -2.28362100 | -0.31121600 |
| C | -3.28827800 | -3.31081800 | -1.05618800 |
| C | -2.48362700 | -1.11099900 | 0.11222800  |
| C | -3.64699600 | -2.83330100 | -2.48517300 |
| H | -4.21383200 | -3.49433200 | -0.48460100 |
| H | -2.77121300 | -4.27661300 | -1.11757700 |
| C | -3.30482700 | 0.10325400  | 0.34783500  |
| C | -3.81319500 | -1.31963100 | -2.64975600 |
| H | -2.86032000 | -3.16332400 | -3.18119900 |
| H | -4.56708400 | -3.35485400 | -2.79338500 |
| C | -4.10593900 | 0.54455900  | -0.89223100 |
| H | -4.00627200 | -0.13832200 | 1.16410900  |

|   |             |             |             |
|---|-------------|-------------|-------------|
| H | -2.70330300 | 0.95564900  | 0.71650100  |
| C | -4.76515200 | -0.61235000 | -1.65750400 |
| H | -4.14605500 | -1.12921900 | -3.68170000 |
| H | -2.81666700 | -0.85911800 | -2.57109000 |
| H | -4.86696600 | 1.26842000  | -0.56188200 |
| H | -3.44049600 | 1.09168200  | -1.58052900 |
| H | -5.63561600 | -0.22097300 | -2.20435000 |
| H | -5.17209700 | -1.33476700 | -0.92938600 |

-----

**NNP-Prod**

G = -1495.24077 Hartree

-----

|   |             |             |             |
|---|-------------|-------------|-------------|
| P | 3.97378000  | 8.65218200  | 5.45199700  |
| N | 3.08630200  | 8.17372100  | 4.17909000  |
| N | 1.89335100  | 7.65366900  | 4.68736400  |
| C | 1.69264100  | 7.80252300  | 6.02207300  |
| C | 0.34189100  | 7.66470800  | 6.66425400  |
| H | 0.49370100  | 7.53243300  | 7.74466200  |
| C | 2.81622200  | 8.79406500  | 8.13087700  |
| H | 2.28965100  | 8.07147000  | 8.77821600  |
| C | 0.97580700  | 7.15445300  | 3.74056200  |
| C | 2.77496200  | 8.33711900  | 6.69928000  |
| C | 0.81495900  | 7.82970300  | 2.52314200  |
| H | 1.42627000  | 8.711172500 | 2.33675300  |
| C | -0.09080300 | 7.35951600  | 1.58178300  |
| H | -0.20625900 | 7.89816100  | 0.63802500  |
| C | -0.85961400 | 6.21004200  | 1.81370900  |
| C | -1.85684200 | 5.73105800  | 0.79157500  |
| H | -1.41618400 | 5.71323600  | -0.21548900 |
| H | -2.73370600 | 6.39579800  | 0.75384900  |
| H | -2.21355300 | 4.71962500  | 1.02678400  |
| C | -0.66270100 | 5.52856100  | 3.01675100  |
| H | -1.21826500 | 4.60792700  | 3.20918600  |
| C | 0.25553400  | 5.97818600  | 3.96481700  |
| H | 0.44120400  | 5.39382300  | 4.86600400  |
| C | 4.50349200  | 10.39443600 | 5.26653200  |
| C | 3.83858400  | 11.18247000 | 4.32335600  |

|   |             |             |            |
|---|-------------|-------------|------------|
| H | 3.10453700  | 10.70377600 | 3.67080800 |
| C | 4.12187800  | 12.54453800 | 4.23062800 |
| H | 3.61164400  | 13.15736600 | 3.48590600 |
| C | 5.05178000  | 13.12431000 | 5.09388700 |
| H | 5.26602300  | 14.19219700 | 5.02697700 |
| C | 5.70943200  | 12.34124600 | 6.04409300 |
| H | 6.43607700  | 12.79569000 | 6.71928700 |
| C | 5.44252500  | 10.97582400 | 6.12687000 |
| H | 5.96835400  | 10.36004200 | 6.86145200 |
| C | 5.55655000  | 7.79042800  | 5.80517300 |
| C | 5.55032300  | 6.71522400  | 6.69937700 |
| H | 4.61974100  | 6.45223500  | 7.20974400 |
| C | 6.71687900  | 5.98735800  | 6.92998600 |
| H | 6.70932700  | 5.15533200  | 7.63579500 |
| C | 7.89030500  | 6.32005400  | 6.25382400 |
| H | 8.80228200  | 5.74727600  | 6.42979800 |
| C | 7.89882300  | 7.38284000  | 5.34905000 |
| H | 8.81524600  | 7.63932400  | 4.81533300 |
| C | 6.73690600  | 8.11896000  | 5.12752300 |
| H | 6.74730500  | 8.95604500  | 4.42508900 |
| C | -0.50346400 | 8.92231600  | 6.40614500 |
| H | 2.49324500  | 10.50023200 | 9.40266800 |
| C | 0.19569600  | 10.24293100 | 6.74070300 |
| H | 1.02229100  | 10.41369800 | 6.03101000 |
| C | 0.72805900  | 10.35811700 | 8.18432700 |
| H | 0.20117300  | 9.63689900  | 8.83515000 |
| C | 2.24246500  | 10.19943700 | 8.37221300 |
| H | 2.76033700  | 10.91167400 | 7.70623100 |
| H | -0.20479700 | 6.78374500  | 6.31140000 |
| H | 3.86433300  | 8.78443300  | 8.47591800 |
| H | 0.46086700  | 11.35085800 | 8.57686100 |
| H | -1.42965900 | 8.83806500  | 6.99837900 |
| H | -0.80851100 | 8.93282400  | 5.34694000 |
| H | -0.52893700 | 11.05030100 | 6.55669600 |

-----

**PPP-Prod**

G = -2068.389334 Hartree

---

|   |             |             |            |
|---|-------------|-------------|------------|
| P | 3.75632400  | 9.37048400  | 4.86111000 |
| P | 3.14144900  | 9.88184500  | 2.90380300 |
| P | 1.05104300  | 9.37290700  | 3.36869800 |
| C | 1.11688400  | 9.14179900  | 5.21085000 |
| C | -0.20968700 | 9.04935900  | 5.91145600 |
| H | -0.09527300 | 8.51519200  | 6.86718900 |
| C | 2.43605900  | 9.08035800  | 7.39052700 |
| H | 1.74988900  | 8.31390400  | 7.78773200 |
| C | 0.80370600  | 7.56702800  | 2.98580200 |
| C | 2.27827400  | 9.16864100  | 5.88862500 |
| C | -0.50440200 | 7.10615500  | 2.80643100 |
| H | -1.33652400 | 7.81488100  | 2.84152000 |
| C | -0.76046300 | 5.75333300  | 2.57417800 |
| H | -1.79061500 | 5.41408200  | 2.44180300 |
| C | 0.28274500  | 4.82788600  | 2.49564400 |
| C | 0.02050000  | 3.37093200  | 2.21722300 |
| H | 0.33206500  | 3.10508600  | 1.19548800 |
| H | -1.04615700 | 3.13066400  | 2.31628500 |
| H | 0.58417800  | 2.72777300  | 2.90818200 |
| C | 1.59390600  | 5.29883800  | 2.65321200 |
| H | 2.42856200  | 4.59588600  | 2.58472300 |
| C | 1.85328800  | 6.64488700  | 2.88951700 |
| H | 2.88401500  | 6.99616600  | 2.98486000 |
| C | 4.76437000  | 10.67534300 | 5.66426600 |
| C | 4.54710100  | 12.00539300 | 5.28838100 |
| H | 3.86706500  | 12.21593000 | 4.45904300 |
| C | 5.19394300  | 13.03601800 | 5.96848400 |
| H | 5.02305300  | 14.07135700 | 5.67023400 |
| C | 6.05545200  | 12.74496800 | 7.02607700 |
| H | 6.55904400  | 13.55317400 | 7.55879000 |
| C | 6.27766700  | 11.41967700 | 7.40013400 |
| H | 6.95467000  | 11.18872700 | 8.22382300 |
| C | 5.63651900  | 10.38463700 | 6.72116200 |
| H | 5.81830300  | 9.34893800  | 7.01609400 |
| C | 4.74102800  | 7.84266500  | 5.10574700 |
| C | 4.12934200  | 6.67264500  | 5.56793000 |
| H | 3.07600000  | 6.68693100  | 5.85912700 |

|   |             |             |            |
|---|-------------|-------------|------------|
| C | 4.85608000  | 5.48366100  | 5.63612100 |
| H | 4.37272400  | 4.57525900  | 5.99864800 |
| C | 6.19135400  | 5.45625800  | 5.23790100 |
| H | 6.75796000  | 4.52538100  | 5.29014200 |
| C | 6.80254700  | 6.61965400  | 4.76585400 |
| H | 7.84546300  | 6.59931400  | 4.44636700 |
| C | 6.08036900  | 7.80782600  | 4.69588000 |
| H | 6.55955500  | 8.71540600  | 4.31917200 |
| C | -0.79245100 | 10.44941700 | 6.16533400 |
| H | 2.56053100  | 10.26625000 | 9.17026600 |
| C | 0.16240900  | 11.42230200 | 6.86248000 |
| H | 0.97799600  | 11.69556000 | 6.17221700 |
| C | 0.76407400  | 10.92249000 | 8.19036900 |
| H | 0.11121000  | 10.14683600 | 8.62930100 |
| C | 2.20699800  | 10.40458300 | 8.13599400 |
| H | 2.85332500  | 11.18139000 | 7.69278000 |
| H | -0.91680300 | 8.46516600  | 5.30221100 |
| H | 3.45188300  | 8.72193300  | 7.62325700 |
| H | 0.75592600  | 11.75248900 | 8.91285500 |
| H | -1.70662600 | 10.33410600 | 6.77049700 |
| H | -1.10207000 | 10.88432100 | 5.20193300 |
| H | -0.39631500 | 12.35211400 | 7.04666100 |

-----

**AsAsP-Prod**

G = -5857.174946 Hartree

-----

|    |             |             |            |
|----|-------------|-------------|------------|
| P  | 3.75525900  | 9.42556000  | 4.82172300 |
| As | 3.26750800  | 10.03451100 | 2.72176900 |
| As | 0.95937100  | 9.47859800  | 3.16247500 |
| C  | 1.07045400  | 9.27265900  | 5.13120400 |
| C  | -0.25326200 | 9.20946200  | 5.84031800 |
| H  | -0.14973100 | 8.67136800  | 6.79530000 |
| C  | 2.37907100  | 9.15544600  | 7.30744700 |
| H  | 1.66840500  | 8.40305200  | 7.68748800 |
| C  | 0.80188000  | 7.52343600  | 2.88731900 |
| C  | 2.23384400  | 9.26901500  | 5.80248500 |
| C  | -0.48219900 | 6.97140900  | 2.83503000 |

|   |             |             |            |
|---|-------------|-------------|------------|
| H | -1.35956600 | 7.62287000  | 2.88685400 |
| C | -0.66194300 | 5.59297600  | 2.70965700 |
| H | -1.67370800 | 5.18130400  | 2.67682800 |
| C | 0.43435300  | 4.73080700  | 2.61659400 |
| C | 0.24699800  | 3.24590100  | 2.44495300 |
| H | 0.33193400  | 2.96119000  | 1.38468000 |
| H | -0.74209800 | 2.92425900  | 2.79730700 |
| H | 1.01145300  | 2.68227300  | 2.99767300 |
| C | 1.71740800  | 5.29205300  | 2.65025700 |
| H | 2.59153500  | 4.63974000  | 2.57275700 |
| C | 1.90164500  | 6.66683600  | 2.77873400 |
| H | 2.91262300  | 7.08400800  | 2.78559300 |
| C | 4.79292200  | 10.65239400 | 5.70834000 |
| C | 4.63795800  | 12.00592400 | 5.38800900 |
| H | 3.98580600  | 12.28359200 | 4.55585200 |
| C | 5.31065200  | 12.97831500 | 6.12610400 |
| H | 5.18690400  | 14.03183100 | 5.87148100 |
| C | 6.13874200  | 12.60612500 | 7.18494200 |
| H | 6.66360600  | 13.36885000 | 7.76228600 |
| C | 6.30094400  | 11.25768800 | 7.50220700 |
| H | 6.95246000  | 10.96274000 | 8.32600700 |
| C | 5.63215200  | 10.28054900 | 6.76635300 |
| H | 5.76652400  | 9.22650200  | 7.01822100 |
| C | 4.64336000  | 7.84010200  | 5.05697400 |
| C | 3.96287700  | 6.69838000  | 5.49174200 |
| H | 2.90650500  | 6.76276800  | 5.76342100 |
| C | 4.62513600  | 5.47153800  | 5.55255600 |
| H | 4.08666700  | 4.58460400  | 5.88971500 |
| C | 5.96397000  | 5.37948900  | 5.17797400 |
| H | 6.47973200  | 4.41925500  | 5.22503700 |
| C | 6.64429900  | 6.51619500  | 4.73525600 |
| H | 7.69035000  | 6.44579400  | 4.43371000 |
| C | 5.98638200  | 7.74084700  | 4.66933300 |
| H | 6.51785000  | 8.62650300  | 4.31092000 |
| C | -0.80251400 | 10.62155600 | 6.10221300 |
| H | 2.53119500  | 10.30572500 | 9.10728600 |
| C | 0.17301300  | 11.56387700 | 6.81235900 |
| H | 0.99698900  | 11.82600500 | 6.12788300 |



|   |             |             |            |
|---|-------------|-------------|------------|
| C | 0.75871800  | 11.03318800 | 8.13497700 |
| H | 0.08228500  | 10.27365200 | 8.56626000 |
| C | 2.18525800  | 10.47268400 | 8.07464200 |
| H | 2.85581300  | 11.23778500 | 7.64794200 |
| H | -0.97946200 | 8.64375600  | 5.23573600 |
| H | 3.38120200  | 8.76266100  | 7.54247600 |
| H | 0.77603400  | 11.85583500 | 8.86566700 |
| H | -1.72151100 | 10.52310700 | 6.70295900 |
| H | -1.10027300 | 11.07347000 | 5.14249400 |
| H | -0.36432600 | 12.50418300 | 7.00660900 |

-----

**SbSbP-Prod**

G = -1866.275558 Hartree

-----

|    |             |             |            |
|----|-------------|-------------|------------|
| P  | 3.41811400  | 9.53619900  | 4.77919000 |
| Sb | 3.08210400  | 10.66349700 | 2.55700400 |
| Sb | 0.52970900  | 9.59294900  | 2.92593100 |
| C  | 0.70136800  | 9.56827700  | 5.13054000 |
| C  | -0.59600800 | 9.65880100  | 5.88934300 |
| H  | -0.51478500 | 9.16553700  | 6.87110900 |
| C  | 2.04268700  | 9.40832000  | 7.28200200 |
| H  | 1.27137500  | 8.73131400  | 7.68477700 |
| C  | 0.99781100  | 7.45765900  | 2.86929800 |
| C  | 1.87920200  | 9.51160500  | 5.77466300 |
| C  | 0.20581700  | 6.56518500  | 3.59941400 |
| H  | -0.65009900 | 6.92851500  | 4.17718000 |
| C  | 0.49288900  | 5.19863300  | 3.61759100 |
| H  | -0.13475800 | 4.52228300  | 4.20376300 |
| C  | 1.57198400  | 4.68208800  | 2.89530400 |
| C  | 1.91626700  | 3.21681100  | 2.93208300 |
| H  | 1.98980700  | 2.79962400  | 1.91726100 |
| H  | 1.16337600  | 2.64026500  | 3.48572300 |
| H  | 2.89224300  | 3.06091400  | 3.41918300 |
| C  | 2.35167700  | 5.57488100  | 2.15016800 |
| H  | 3.20503500  | 5.19505700  | 1.58146800 |
| C  | 2.07293300  | 6.93954400  | 2.13792100 |
| H  | 2.72331700  | 7.61575800  | 1.57524700 |

|   |             |             |            |
|---|-------------|-------------|------------|
| C | 4.67198600  | 10.40640600 | 5.79923700 |
| C | 4.75615600  | 11.80183300 | 5.71222600 |
| H | 4.11454600  | 12.33666100 | 5.00664200 |
| C | 5.65087100  | 12.50032100 | 6.52067700 |
| H | 5.71054800  | 13.58704600 | 6.44691000 |
| C | 6.46802600  | 11.81225800 | 7.41745800 |
| H | 7.16894300  | 12.36018200 | 8.04909600 |
| C | 6.39381000  | 10.42240600 | 7.50123900 |
| H | 7.03614100  | 9.88004400  | 8.19647200 |
| C | 5.50123100  | 9.71847600  | 6.69384800 |
| H | 5.45312100  | 8.62928600  | 6.75903400 |
| C | 3.99404500  | 7.79663600  | 4.76859700 |
| C | 3.26924200  | 6.77729100  | 5.39159500 |
| H | 2.32825700  | 7.00194100  | 5.89735900 |
| C | 3.73023600  | 5.46118200  | 5.33660200 |
| H | 3.15165000  | 4.66861000  | 5.81429900 |
| C | 4.91023800  | 5.15947500  | 4.66100900 |
| H | 5.26917200  | 4.12951100  | 4.61996100 |
| C | 5.62866700  | 6.17488400  | 4.02524900 |
| H | 6.54621400  | 5.94081900  | 3.48343600 |
| C | 5.17013200  | 7.48778100  | 4.07298300 |
| H | 5.72047100  | 8.27906900  | 3.55697700 |
| C | -0.99307400 | 11.13079300 | 6.09506300 |
| H | 2.32074700  | 10.55452400 | 9.06949600 |
| C | 0.07947100  | 11.99459200 | 6.76413100 |
| H | 0.91616400  | 12.15277800 | 6.06370300 |
| C | 0.62512400  | 11.44769600 | 8.09684900 |
| H | -0.11830300 | 10.77260000 | 8.55731400 |
| C | 1.98689600  | 10.74514400 | 8.03698600 |
| H | 2.72877400  | 11.43361000 | 7.59935500 |
| H | -1.40657800 | 9.14978200  | 5.34501500 |
| H | 3.00776400  | 8.92835200  | 7.50766600 |
| H | 0.73413200  | 12.28475200 | 8.80290500 |
| H | -1.91345300 | 11.15234600 | 6.70151600 |
| H | -1.25255800 | 11.57501900 | 5.11966300 |
| H | -0.36141700 | 12.98837400 | 6.93366200 |

---

**BiBiP-Prod**

G = -1814.927408 Hartree

---

|    |             |             |             |
|----|-------------|-------------|-------------|
| P  | -1.36660200 | 0.69986400  | -0.00180200 |
| Bi | -0.30018800 | -0.01454900 | -2.29448500 |
| Bi | 1.42921300  | -1.60506200 | -0.53827800 |
| C  | 0.21699600  | -1.11896900 | 1.35188900  |
| C  | 0.67463000  | -1.92544500 | 2.53830900  |
| H  | 0.45718100  | -1.39687700 | 3.48013900  |
| C  | -1.56127900 | 0.03678800  | 2.74488500  |
| H  | -0.84371500 | 0.11492800  | 3.57803500  |
| C  | 2.95555800  | -0.07057000 | 0.17383100  |
| C  | -0.80245700 | -0.24978500 | 1.45437100  |
| C  | 4.09423200  | -0.52531000 | 0.84541000  |
| H  | 4.27170000  | -1.59824900 | 0.97401300  |
| C  | 5.02894200  | 0.37510500  | 1.36372600  |
| H  | 5.91315100  | -0.00221900 | 1.88449200  |
| C  | 4.85047800  | 1.75396100  | 1.22413200  |
| C  | 5.86986900  | 2.72994700  | 1.75272300  |
| H  | 6.49920900  | 3.11910700  | 0.93735600  |
| H  | 6.53347400  | 2.25525500  | 2.48793400  |
| H  | 5.38507200  | 3.59248300  | 2.23173700  |
| C  | 3.70723600  | 2.20573600  | 0.55038200  |
| H  | 3.54599200  | 3.28082900  | 0.42790300  |
| C  | 2.77606100  | 1.30898100  | 0.02798000  |
| H  | 1.90100800  | 1.69191200  | -0.50911600 |
| C  | -3.19714900 | 0.52034500  | 0.04114000  |
| C  | -3.75362700 | -0.58622000 | -0.61213700 |
| H  | -3.10664600 | -1.23762400 | -1.20648900 |
| C  | -5.11783600 | -0.85068000 | -0.50511100 |
| H  | -5.54203000 | -1.71706500 | -1.01473800 |
| C  | -5.93699500 | -0.00839700 | 0.24659400  |
| H  | -7.00525700 | -0.21503000 | 0.32870100  |
| C  | -5.38996300 | 1.10295200  | 0.88751900  |
| H  | -6.02828200 | 1.76770900  | 1.47149200  |
| C  | -4.02469500 | 1.36880200  | 0.78743400  |
| H  | -3.60534300 | 2.23919400  | 1.29634400  |
| C  | -1.07025700 | 2.44940100  | 0.45123400  |

|   |             |             |             |
|---|-------------|-------------|-------------|
| C | -0.10428700 | 2.78126400  | 1.40720600  |
| H | 0.43429700  | 1.99099400  | 1.93594900  |
| C | 0.18709700  | 4.12030200  | 1.67056100  |
| H | 0.94402600  | 4.36937200  | 2.41586900  |
| C | -0.48180000 | 5.13187000  | 0.98428600  |
| H | -0.25409200 | 6.17823500  | 1.19315200  |
| C | -1.44088200 | 4.80446500  | 0.02359900  |
| H | -1.96213000 | 5.59278300  | -0.52155000 |
| C | -1.72940200 | 3.47004400  | -0.24762400 |
| H | -2.47361800 | 3.21903000  | -1.00820900 |
| C | -0.00036400 | -3.30535500 | 2.56936600  |
| H | -3.26310700 | -0.53391000 | 3.90939400  |
| C | -1.52937200 | -3.26243700 | 2.51963200  |
| H | -1.85837500 | -2.93972100 | 1.51780400  |
| C | -2.19230600 | -2.36541100 | 3.58118000  |
| H | -1.52105100 | -2.25539300 | 4.45157600  |
| C | -2.65362800 | -0.98172100 | 3.10781400  |
| H | -3.33041600 | -1.10645100 | 2.24593000  |
| H | 1.76855000  | -2.05933300 | 2.50712900  |
| H | -2.03128500 | 1.02984000  | 2.67338900  |
| H | -3.08645200 | -2.87904600 | 3.96564400  |
| H | 0.32248500  | -3.82282800 | 3.48764000  |
| H | 0.36924500  | -3.91157700 | 1.72533900  |
| H | -1.89242900 | -4.29451200 | 2.63759000  |

-----

**NNN-Prod**

G = -1208.599861 Hartree

-----

|   |            |            |            |
|---|------------|------------|------------|
| N | 3.86779200 | 8.89107400 | 5.55482200 |
| N | 3.12284000 | 8.65277800 | 4.33493200 |
| N | 2.15375400 | 7.71490700 | 4.79502900 |
| C | 1.89526100 | 7.91604300 | 6.12220300 |
| C | 0.60822700 | 7.62684400 | 6.82768300 |
| H | 0.80602000 | 7.63791100 | 7.90958400 |
| C | 2.94563400 | 9.35651600 | 7.99176600 |
| H | 2.58172500 | 8.64354200 | 8.75200500 |
| C | 1.30751500 | 7.17031500 | 3.83245200 |

|   |             |             |             |
|---|-------------|-------------|-------------|
| C | 2.86405900  | 8.69555600  | 6.65460300  |
| C | 1.20765500  | 7.77979600  | 2.57093600  |
| H | 1.80961900  | 8.66416200  | 2.37178600  |
| C | 0.36034600  | 7.24585500  | 1.60591100  |
| H | 0.29641100  | 7.73522200  | 0.63066200  |
| C | -0.41089000 | 6.10353200  | 1.84816800  |
| C | -1.35553400 | 5.56134800  | 0.80735900  |
| H | -0.97993100 | 5.74884500  | -0.20803900 |
| H | -2.34725400 | 6.03493600  | 0.88417600  |
| H | -1.49838100 | 4.47817700  | 0.92420100  |
| C | -0.27271500 | 5.48629300  | 3.09632600  |
| H | -0.82548600 | 4.56664900  | 3.30354400  |
| C | 0.58358200  | 5.99114100  | 4.06951400  |
| H | 0.73095000  | 5.44248300  | 4.99905000  |
| C | 4.38965600  | 10.28589400 | 5.54137800  |
| C | 3.72129500  | 11.24651200 | 4.78931100  |
| H | 2.87862800  | 10.92130500 | 4.18240300  |
| C | 4.15909000  | 12.56903800 | 4.83789300  |
| H | 3.64239100  | 13.32500700 | 4.24495000  |
| C | 5.24502100  | 12.92800400 | 5.63528800  |
| H | 5.57893700  | 13.96569000 | 5.67385400  |
| C | 5.90956700  | 11.95209100 | 6.37620800  |
| H | 6.76713700  | 12.21987900 | 6.99459000  |
| C | 5.49097800  | 10.62329800 | 6.32554500  |
| H | 6.02442200  | 9.85811000  | 6.89000100  |
| C | 5.01235700  | 7.91732300  | 5.65137500  |
| C | 5.18686000  | 7.09744000  | 6.75530900  |
| H | 4.49135800  | 7.14609400  | 7.59269800  |
| C | 6.26113500  | 6.20015500  | 6.76821000  |
| H | 6.40459400  | 5.54803900  | 7.63091900  |
| C | 7.13354100  | 6.13242200  | 5.68802600  |
| H | 7.96706900  | 5.42897700  | 5.70152600  |
| C | 6.93147300  | 6.95878300  | 4.57691900  |
| H | 7.60489600  | 6.89873100  | 3.72087700  |
| C | 5.86535200  | 7.84815200  | 4.55151800  |
| H | 5.65483700  | 8.47702200  | 3.68607500  |
| C | -0.43973200 | 8.69694500  | 6.47750900  |
| H | 2.37729000  | 11.11207600 | 9.09734200  |

|   |             |             |            |
|---|-------------|-------------|------------|
| C | 0.05426800  | 10.14090100 | 6.61847700 |
| H | 0.81287700  | 10.34033300 | 5.84431200 |
| C | 0.61936000  | 10.51854400 | 8.00608500 |
| H | 0.26756400  | 9.79357500  | 8.76246900 |
| C | 2.14398300  | 10.66310200 | 8.11814200 |
| H | 2.49940300  | 11.37706600 | 7.35639500 |
| H | 0.21390300  | 6.63291200  | 6.58994800 |
| H | 3.99732400  | 9.55206500  | 8.25169900 |
| H | 0.18616000  | 11.48349300 | 8.30930800 |
| H | -1.31664200 | 8.54056500  | 7.12727600 |
| H | -0.78137900 | 8.53449000  | 5.44252200 |
| H | -0.79671100 | 10.79824600 | 6.38535900 |

-----

**NNAs-Prod**

G = -3389.584853 Hartree

-----

|    |             |             |             |
|----|-------------|-------------|-------------|
| As | 0.01222800  | -0.92211400 | 0.74227000  |
| C  | 0.10796300  | -0.42122300 | 2.62561700  |
| C  | 1.40160300  | 0.18338300  | -0.03635600 |
| C  | -1.07450400 | -0.44479700 | 3.36992100  |
| C  | 1.32044300  | -0.11429600 | 3.25151100  |
| N  | 0.24017700  | -2.57229300 | 0.18040700  |
| C  | 2.16388000  | -0.36426300 | -1.07066800 |
| C  | 1.58380500  | 1.51651800  | 0.34533700  |
| C  | -1.04865200 | -0.14618200 | 4.73178700  |
| H  | -2.01442100 | -0.70457500 | 2.87366300  |
| C  | 1.34558700  | 0.17357200  | 4.61538100  |
| H  | 2.24781800  | -0.09747100 | 2.67319300  |
| N  | -1.00962800 | -2.98700900 | -0.29067900 |
| C  | 3.12282000  | 0.41914700  | -1.71215700 |
| H  | 1.99037300  | -1.40599900 | -1.35316400 |
| C  | 2.53164900  | 2.30076400  | -0.31058700 |
| H  | 0.99000100  | 1.94313500  | 1.15862300  |
| C  | 0.16135500  | 0.16157100  | 5.35379100  |
| H  | -1.97373900 | -0.15787500 | 5.31030500  |
| H  | 2.29232000  | 0.40892200  | 5.10415300  |
| C  | -1.08442400 | -4.34486300 | -0.67626400 |

|   |             |             |             |
|---|-------------|-------------|-------------|
| C | 3.30295900  | 1.75039300  | -1.33561900 |
| H | 3.72868700  | -0.00877600 | -2.51244400 |
| H | 2.67199600  | 3.34279900  | -0.01907300 |
| H | 0.18305100  | 0.39024400  | 6.42053900  |
| C | -0.03581500 | -4.90160500 | -1.41917300 |
| C | -2.15189400 | -5.15846300 | -0.29020500 |
| H | 4.04768100  | 2.36446700  | -1.84462400 |
| C | -0.08900100 | -6.23439300 | -1.80529000 |
| H | 0.81557500  | -4.26867400 | -1.66681900 |
| C | -2.19967800 | -6.49076900 | -0.69883900 |
| H | -2.93093900 | -4.75398000 | 0.35686300  |
| C | -1.17644600 | -7.05217500 | -1.46601300 |
| H | 0.73526900  | -6.65513200 | -2.38634900 |
| H | -3.04223800 | -7.11338000 | -0.38957800 |
| C | -1.22859000 | -8.48853600 | -1.91642900 |
| H | -2.02381100 | -9.04039200 | -1.39642100 |
| H | -1.42477100 | -8.55576300 | -2.99864400 |
| H | -0.27349000 | -8.99970000 | -1.72407500 |
| C | -2.00849100 | -2.07387600 | -0.39988500 |
| C | -3.22233900 | -2.32261800 | -1.25306100 |
| C | -1.74510300 | -0.81913200 | 0.12565900  |
| C | -2.88536200 | -2.11260600 | -2.73759700 |
| H | -4.00687000 | -1.61776200 | -0.94490900 |
| H | -3.63088400 | -3.32979500 | -1.11676700 |
| C | -2.58760400 | 0.41789800  | -0.01223200 |
| C | -2.18805700 | -0.78723200 | -3.05682400 |
| H | -2.24875600 | -2.94615400 | -3.07677300 |
| H | -3.82325400 | -2.17996200 | -3.31356200 |
| C | -2.41092300 | 1.17568100  | -1.33706500 |
| H | -3.65463800 | 0.16877200  | 0.12205300  |
| H | -2.34408200 | 1.10745900  | 0.81398900  |
| C | -2.94018000 | 0.47891100  | -2.59742700 |
| H | -2.04829200 | -0.74798000 | -4.14762900 |
| H | -1.17382000 | -0.78961000 | -2.62402200 |
| H | -2.91850800 | 2.15009000  | -1.24642300 |
| H | -1.33786100 | 1.39629200  | -1.47574900 |
| H | -2.90492500 | 1.22051000  | -3.40977000 |
| H | -4.01210800 | 0.24653700  | -2.46210400 |

---

**NNSb-Prod**G = -1394.118837 Hartree

---

|    |             |             |             |
|----|-------------|-------------|-------------|
| Sb | 4.49177300  | 8.27688200  | 4.67613800  |
| N  | 2.33145100  | 8.78097800  | 3.37482100  |
| N  | 1.50411800  | 8.12061100  | 3.98827500  |
| C  | 1.57185000  | 7.93267800  | 5.45175800  |
| C  | 0.25052800  | 7.99066200  | 6.16612200  |
| H  | 0.37875800  | 7.58929300  | 7.17993600  |
| C  | 2.92165700  | 7.99082500  | 7.53324800  |
| H  | 2.20179900  | 7.29133300  | 7.99138800  |
| C  | 0.43067200  | 7.42838200  | 3.27377500  |
| C  | 2.78083700  | 7.99133600  | 6.02961200  |
| C  | -0.22229400 | 8.09830600  | 2.24361800  |
| H  | 0.06353600  | 9.12694000  | 2.02092900  |
| C  | -1.20186600 | 7.43311600  | 1.51634800  |
| H  | -1.72375300 | 7.95800000  | 0.71312200  |
| C  | -1.52808400 | 6.09683400  | 1.79019700  |
| C  | -2.58529000 | 5.39129700  | 0.98282100  |
| H  | -2.29680500 | 5.33749000  | -0.07726500 |
| H  | -3.54335500 | 5.92861500  | 1.03503900  |
| H  | -2.74718600 | 4.36773300  | 1.34371500  |
| C  | -0.84237300 | 5.44381900  | 2.81894900  |
| H  | -1.07194200 | 4.39945600  | 3.03935700  |
| C  | 0.13342900  | 6.10234000  | 3.56621400  |
| H  | 0.66748400  | 5.58786300  | 4.36773900  |
| C  | 4.69605600  | 10.42745900 | 4.87571100  |
| C  | 4.28354500  | 11.22920300 | 3.80257600  |
| H  | 3.86356500  | 10.76355400 | 2.90851400  |
| C  | 4.38568700  | 12.61896400 | 3.87171700  |
| H  | 4.05905800  | 13.22844300 | 3.02711400  |
| C  | 4.90133100  | 13.22874700 | 5.01505900  |
| H  | 4.97942800  | 14.31589900 | 5.06962400  |
| C  | 5.31803400  | 12.44183900 | 6.08730900  |
| H  | 5.72306400  | 12.90990300 | 6.98642700  |
| C  | 5.21810800  | 11.05082700 | 6.01553500  |



|   |             |             |            |
|---|-------------|-------------|------------|
| H | 5.55350800  | 10.45027300 | 6.86456400 |
| C | 6.02698000  | 7.72632600  | 6.15300000 |
| C | 5.91314600  | 6.49301000  | 6.81163800 |
| H | 5.00044600  | 5.89653800  | 6.69971900 |
| C | 6.94163900  | 5.99784600  | 7.61352100 |
| H | 6.82360200  | 5.03904000  | 8.12207900 |
| C | 8.12267100  | 6.72589300  | 7.75808200 |
| H | 8.93084400  | 6.34291400  | 8.38342200 |
| C | 8.26781900  | 7.93975400  | 7.08856900 |
| H | 9.19432400  | 8.50921000  | 7.18445900 |
| C | 7.23148400  | 8.43005200  | 6.29088200 |
| H | 7.37466500  | 9.37960600  | 5.76749500 |
| C | -0.24893000 | 9.44226700  | 6.24506000 |
| H | 3.10653600  | 9.30294900  | 9.21467300 |
| C | 0.77519300  | 10.42118200 | 6.82398600 |
| H | 1.59977200  | 10.56956100 | 6.10564000 |
| C | 1.35562800  | 10.00571200 | 8.18929800 |
| H | 0.65092100  | 9.32983400  | 8.70666200 |
| C | 2.75648100  | 9.38168900  | 8.17318300 |
| H | 3.44096000  | 10.08231300 | 7.67073100 |
| H | -0.51137000 | 7.37054600  | 5.67616300 |
| H | 3.91958600  | 7.62533700  | 7.80694800 |
| H | 1.42141300  | 10.89958500 | 8.82780100 |
| H | -1.16331500 | 9.45595200  | 6.86064000 |
| H | -0.54893700 | 9.77935600  | 5.23845100 |
| H | 0.28157300  | 11.39983400 | 6.91828200 |

-----

**NNBi-Prod**

G = -1368.435783 Hartree

-----

|    |            |            |            |
|----|------------|------------|------------|
| Bi | 4.38349600 | 8.72854500 | 4.31129500 |
| N  | 1.72287600 | 9.33680300 | 3.22979400 |
| N  | 1.22579600 | 8.43521000 | 3.88050200 |
| C  | 1.44871400 | 8.28229400 | 5.34257300 |
| C  | 0.17807600 | 8.26930900 | 6.14649600 |
| H  | 0.40368600 | 7.90127400 | 7.15689700 |
| C  | 2.96323000 | 8.50836300 | 7.30614900 |

|   |             |             |            |
|---|-------------|-------------|------------|
| H | 2.36187500  | 7.76406300  | 7.85876600 |
| C | 0.36925200  | 7.41661300  | 3.25467700 |
| C | 2.68935300  | 8.40823800  | 5.82310000 |
| C | -0.37189700 | 7.77633100  | 2.13256200 |
| H | -0.30541500 | 8.80424200  | 1.77489700 |
| C | -1.14632400 | 6.81606600  | 1.49459000 |
| H | -1.73574000 | 7.09631700  | 0.61858100 |
| C | -1.18088600 | 5.48934000  | 1.95020700 |
| C | -2.02859600 | 4.46440700  | 1.24450500 |
| H | -1.77982800 | 4.41817200  | 0.17446900 |
| H | -3.09610300 | 4.71900400  | 1.32205600 |
| H | -1.88602800 | 3.46416500  | 1.67282900 |
| C | -0.41367700 | 5.15307200  | 3.06885100 |
| H | -0.41615000 | 4.12355200  | 3.43241300 |
| C | 0.35866100  | 6.10959400  | 3.72839100 |
| H | 0.95544500  | 5.83906600  | 4.60157700 |
| C | 4.77832900  | 10.78381600 | 5.16572700 |
| C | 3.95159000  | 11.81932700 | 4.71188800 |
| H | 3.19540900  | 11.61933000 | 3.94696100 |
| C | 4.06218900  | 13.10010700 | 5.25571600 |
| H | 3.40693700  | 13.89853500 | 4.90221800 |
| C | 5.00417500  | 13.35826300 | 6.25210200 |
| H | 5.08919100  | 14.35889200 | 6.67926100 |
| C | 5.83521300  | 12.33292000 | 6.70147200 |
| H | 6.57121800  | 12.52864400 | 7.48364000 |
| C | 5.72164300  | 11.04891700 | 6.16217300 |
| H | 6.36169300  | 10.25036200 | 6.54536000 |
| C | 5.92414400  | 7.63508600  | 5.58821200 |
| C | 5.57055800  | 6.49096600  | 6.31481500 |
| H | 4.52208000  | 6.17876100  | 6.36911300 |
| C | 6.53486200  | 5.73498800  | 6.98387900 |
| H | 6.23753500  | 4.84925700  | 7.54870100 |
| C | 7.87672700  | 6.11109000  | 6.93047500 |
| H | 8.63237800  | 5.52348400  | 7.45444500 |
| C | 8.24846600  | 7.23900300  | 6.20002400 |
| H | 9.29780200  | 7.53577500  | 6.14822000 |
| C | 7.27866700  | 7.98890400  | 5.53088200 |
| H | 7.59614400  | 8.86728000  | 4.95950800 |

|   |             |             |            |
|---|-------------|-------------|------------|
| C | -0.42829100 | 9.67799300  | 6.22950100 |
| H | 3.15543000  | 9.89083700  | 8.92480200 |
| C | 0.56010500  | 10.74231000 | 6.70831600 |
| H | 1.31461700  | 10.92234000 | 5.92399600 |
| C | 1.27274100  | 10.40245800 | 8.03128400 |
| H | 0.66945100  | 9.67943100  | 8.60971100 |
| C | 2.71818800  | 9.90466500  | 7.91348700 |
| H | 3.29631100  | 10.64759500 | 7.34299100 |
| H | -0.55969400 | 7.57840500  | 5.71374700 |
| H | 4.01482400  | 8.25095700  | 7.49943200 |
| H | 1.30938100  | 11.31067500 | 8.65162600 |
| H | -1.29412700 | 9.63911000  | 6.91079700 |
| H | -0.82354300 | 9.96452500  | 5.24076300 |
| H | 0.00729900  | 11.68715900 | 6.81896600 |
